# Supplementary material for: Nanoparticle catalyzed reaction (NPCR): ZnO-NP catalyzed Ugi-reaction in aqueous medium
Source: Royal Society of Chemistry journal article supplement (doi:10.1039/c3gc41101j), 2013-01-01
Supplement: c3gc41101j.pdf [file c3gc41101j.pdf]

## Supporting Information

### Nano-particle Catalyzed Reaction (NPCR) : ZnO-NP catalyzed Ugi-reaction in aqueous medium

Atul Kumar,\* Deepti Saxena and Maneesh Kumar Gupta

*Medicinal and Process Chemistry Division, CSIR-Central Drug Research Institute,  
Lucknow-226001, India  
[dratulsax@gmail.com](mailto:dratulsax@gmail.com)*

**General:** All the reagents and solvents were purchased from Sigma-Aldrich or Merck chemical Co. Column chromatography was performed using Spectrochem silica gel (100-200). Organic solvents were concentrated under reduced pressure on Ika rotary evaporator. The progress of reaction was checked by thin-layer chromatography. The plates were visualized first with UV illumination followed by iodine.  $^1\text{H}$  and  $^{13}\text{C}$  NMR spectra were obtained using either a Bruker DRX-200 or AV-300 spectrometer. Chemical shifts are reported in ppm from tetramethylsilane with the solvent resonance as the internal standard and  $^1\text{H}$  NMR Spectra are reported in the order: multiplicity, coupling constant (J value) in hertz (Hz) and no of protons; signals were characterized as s (singlet), d (doublet), t (triplet), m (multiplet).  $^{13}\text{C}$  NMR spectra were recorded at 50 or 75 MHz. Mass spectra were obtained using JEOL SX-102 (ESI) instrument. Elemental analysis was performed using a Perkin-Elmer Autosystem XL Analyzer.

#### General experiment procedure for the synthesis of compound (5)

Aldehyde (1 mmol), aniline (2 mmol), isocyanide (1 mmol) and ZnO <50 nm (15 mol %) were placed into a flask. Water (3 mL) was added to the mixture and stirred for 5 min at room temperature. Progress of reaction was monitored by TLC, after completion of the reaction, the reaction mixture was diluted with water and extracted with ethyl acetate, dried over sodium sulphate and evaporated under vacuum to give crude product, which was purified by silica gel (100-200 mesh) column chromatography to afford the corresponding product.

### General procedure for the synthesis of compound (6)

In a 50-mL round-bottom flask, iodine (0.2 mmol), 2-arylamino-2-phenylacetimidamide (1 mmol), and surfactant (sodium dodecyl sulfate, 10 mol %) were added in H<sub>2</sub>O (5 mL) and stirred for 6h at 80°C and reaction was monitored by TLC. The aqueous part was diluted and extracted with ethyl acetate, the organic layer was washed with brine and dried over anhydrous Na<sub>2</sub>SO<sub>4</sub>. Evaporation of solvent gave a crude product which was purified by column chromatography (silica gel, ethyl acetate:hexane).

### General procedure for the synthesis of $\alpha$ -Amino Acid (7)

In a 50-mL round-bottom flask, 2-arylamino-2-phenylacetimidamide (1 mmol) was added in 1:3 ratio of H<sub>2</sub>O: EtOH with 20 mol% NaOH and stirred for 3h at 70°C. After completion of reaction as evidenced by TLC, solvent was removed in vacuum. The aqueous part was diluted and extracted with ethyl acetate, the organic layer was washed with brine and dried over anhydrous Na<sub>2</sub>SO<sub>4</sub>. Evaporation of solvent gave a crude product which was purified by column chromatography (silica gel, ethyl acetate:hexane).

### ZnO-NPs purchase from Sigma-Aldrich

Catlog No. 677450. <50 nm particle size.

**Table 2.** Recovery and Reuse of ZnO-Nanoparticle for the Synthesis of **5a**.

| Cycle     |    |    |    |    |    |
|-----------|----|----|----|----|----|
| Entry     | 1  | 2  | 3  | 4  | 5  |
| Yield (%) | 80 | 78 | 77 | 74 | 70 |

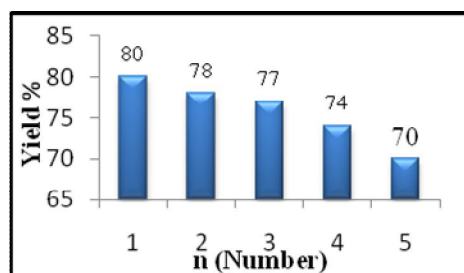

### Characterization data for synthesized compounds:

#### **N-Tert-butyl-N',2-diphenyl-2-(phenylamino)acetimidamide (5a)**

Solid, ESI MS ( $m/z$ ) = 358 (M+H), IR (KBr)  $\nu_{\max}$  : 3289, 3027, 2966, 2906, 1634, 1601, 1591, 1485, 1310, 1253, 1185, 1166, 1070, 745  $\text{cm}^{-1}$ .  $^1\text{H}$  NMR (300 MHz;  $\text{CDCl}_3$ )  $\delta_{\text{H}}$  : 1.48 (s, 9H), 4.22 (s, 1H, NH), 4.92 (s, 1H, CH), 6.16 (s, 1H, NH), 6.51 (d,  $J = 5.7$  Hz, 2H), 6.66 (t,  $J = 1.0$  Hz, 1H), 6.96 (d,  $J = 5.1$  Hz, 2H), 7.08-7.13 (m, 5H), 7.29 (t,  $J = 4.2$  Hz, 1H), 7.40 (q,  $J = 1.3$  Hz, 4H).  $^{13}\text{C}$  NMR (50 MHz;  $\text{CDCl}_3$ )  $\delta_{\text{C}}$  : 29.6, 52.1, 56.5, 112.1, 119.0, 120.0, 123.4, 127.4, 128.8, 128.9, 128.9, 139.9, 146.0, 148.9, 158.8. Analysis calculated for :  $\text{C}_{24}\text{H}_{27}\text{N}_3$ , C 80.63, H 7.61, N 11.75, Found : C 80.58, H 7.53, N 11.82.

#### **2-(4-Chlorophenyl)-N-cyclohexyl-N'-(4-methoxyphenyl)-2-((4-methoxyphenyl)amino)acetimidamide (5b)**

Solid, ESI MS ( $m/z$ ) = 478 (M+H), IR (KBr)  $\nu_{\max}$  : 3319, 3030, 2860, 2730, 2140, 1650, 747  $\text{cm}^{-1}$ .  $^1\text{H}$  NMR (300 MHz;  $\text{CDCl}_3$ )  $\delta_{\text{H}}$  : 1.27-1.59 (m, 8H), 1.60 (br, s, 2H), 1.91 (br, s, 1H), 3.80 (s, 3H,  $\text{OCH}_3$ ), 3.95 (s, 3H,  $\text{OCH}_3$ ), 4.67 (s, 1H, NH), 5.32 (s, 1H, CH), 6.11 (s, 1H, NH), 6.44 (d,  $J = 8.5$  Hz, 2H), 6.94 (d,  $J = 8.6$  Hz, 2H), 7.04 (d,  $J = 6.4$  Hz, 4H), 7.28-7.37 (m, 4H).  $^{13}\text{C}$  NMR (50 MHz;  $\text{CDCl}_3$ )  $\delta_{\text{C}}$  : 25.4, 26.5, 33.9, 53.9, 55.3, 56.6, 113.9, 114.4, 114.9, 122.9, 128.2, 128.5, 132.6, 136.4, 141.3, 141.5, 141.7, 154.3, 154.7, 158.2. Analysis calculated for :  $\text{C}_{28}\text{H}_{32}\text{ClN}_3\text{O}_2$ , C 70.35, H 6.75, N 8.79 Found : C 70.23, H 6.87, N 8.66.

#### **N'-(4-Chlorophenyl)-2-(4-chlorophenylamino)-N-cyclohexyl-2-(4-methoxyphenyl)acetimidamide (5c)**

Solid, ESI MS ( $m/z$ ) = 482 (M+H), IR (KBr)  $\nu_{\max}$  : 3384, 2967, 2901, 1641, 1491, 1482, 1284, 746  $\text{cm}^{-1}$ .  $^1\text{H}$  NMR (300 MHz;  $\text{CDCl}_3$ )  $\delta_{\text{H}}$  : 1.10-1.37 (m, 4H), 1.49 (t,  $J = 4.7$  Hz, 2H), 1.67 (t,  $J = 14.5$  Hz, 4H), 2.01 (t,  $J = 13.5$  Hz, 1H), 3.74 (s, 3H,  $\text{OCH}_3$ ), 4.33 (s, 1H, NH), 4.61 (s, 1H, CH), 5.85 (s, 1H, NH), 6.11 (s, 1H), 6.75 (d,  $J = 8.4$  Hz, 4H), 7.08 (s, 1H), 7.18 (d,  $J = 8.6$  Hz, 4H), 7.28 (d,  $J = 3.5$  Hz, 2H).  $^{13}\text{C}$  NMR (75 MHz;  $\text{CDCl}_3$ )  $\delta_{\text{C}}$  : 24.6, 24.7, 25.3, 29.6, 32.7, 32.9, 48.4, 55.3, 58.8, 113.1, 114.7, 120.4, 122.9, 127.7, 128.3, 128.8, 130.1, 141.4, 159.8. Analysis calculated for :  $\text{C}_{27}\text{H}_{29}\text{Cl}_2\text{N}_3\text{O}$ , C 67.22, H 6.06, N 8.71 Found : C 67.13, H 5.96, N 8.83.

#### **N-Tert-butyl-N'-(3-chlorophenyl)-2-(3-chlorophenylamino)-2-(3-methoxyphenyl)acetimidamide (5d)**

Solid, ESI MS ( $m/z$ ) = 456 (M+H), IR (KBr)  $\nu_{\max}$  : 3373, 2966, 1719, 1669, 1633, 1588, 1492, 1373, 1212, 1127, 1033, 749  $\text{cm}^{-1}$ .  $^1\text{H}$  NMR (300 MHz;  $\text{CDCl}_3$ )  $\delta_{\text{H}}$  : 1.46 (s, 9H), 3.74 (s, 3H,  $\text{OCH}_3$ ), 4.76 (s, 1H, NH), 5.31 (s, 1H, CH), 5.89 (s, 1H, NH), 6.40 (d,  $J = 8.3$  Hz, 2H), 6.58 (d,  $J = 7.3$  Hz, 2H), 6.84 (d,  $J = 5.7$  Hz, 2H), 7.12-7.18 (m, 4H), 7.19 (d,  $J = 8.4$

Hz, 2H).  $^{13}\text{C}$  NMR (75 MHz,  $\text{CDCl}_3$ )  $\delta_{\text{C}}$  : 29.6, 51.9, 55.2, 58.1, 111.1, 112.5, 114.6, 115.3, 118.8, 119.4, 119.6, 121.4, 123.9, 129.1, 130.2, 130.9, 133.4, 134.2, 141.1, 148.1, 149.2, 157.2, 160.1. Analysis calculated for :  $\text{C}_{25}\text{H}_{27}\text{Cl}_2\text{N}_3\text{O}$ , C 65.79, H 5.96, N 9.21 Found : C 65.88, H 6.08, N 9.12.

**N-Tert-butyl-N'-(3-methoxyphenyl)-2-(3-methoxyphenylamino)-2-phenylacetimidamide (5e)**

Solid, ESI MS ( $m/z$ ) = 418 (M+H), IR (KBr)  $\nu_{\text{max}}$  : 3375, 2976, 1720, 1668, 1589, 1482, 1383, 1128, 1071, 746  $\text{cm}^{-1}$ .  $^1\text{H}$  NMR (300 MHz;  $\text{CDCl}_3$ )  $\delta_{\text{H}}$  : 1.51 (s, 9H), 3.75 (s, 3H,  $\text{OCH}_3$ ), 3.79 (s, 3H,  $\text{OCH}_3$ ), 4.34 (s, 1H, NH), 4.70 (s, 1H, CH), 6.01 (s, 1H, NH), 6.20 (d,  $J$  = 1.2 Hz, 1H), 6.55 (t,  $J$  = 1.3 Hz, 1H), 6.74-6.87 (m, 4H), 6.95 (t,  $J$  = 4.9 Hz, 1H), 7.10 (d,  $J$  = 5.9 Hz, 3H), 7.13 (d,  $J$  = 2.6 Hz, 3H).  $^{13}\text{C}$  NMR (50 MHz;  $\text{CDCl}_3$ )  $\delta_{\text{C}}$  : 29.6, 51.9, 55.1, 55.4, 57.9, 100.9, 104.9, 105.8, 106.0, 106.0, 106.3, 106.9, 116.3, 127.4, 127.5, 128.9, 129.6, 130.1, 140.1, 147.9, 149.6, 157.3, 159.9. Analysis calculated for :  $\text{C}_{26}\text{H}_{31}\text{N}_3\text{O}_2$ , C 74.79, H 7.48, N 10.06, Found : C 74.68, H 7.57, N 9.93.

**2-(4-Chlorophenyl)-N'-(4-fluorophenyl)-2-(4-fluorophenylamino)-N-(tosylmethyl)acetimidamide (5f)**

Solid, ESI MS ( $m/z$ ) = 540 (M+H), IR (KBr)  $\nu_{\text{max}}$  : 3469, 2989, 1730, 1678, 1589, 1482, 1383, 1128, 1089, 751  $\text{cm}^{-1}$ .  $^1\text{H}$  NMR (300 MHz;  $\text{CDCl}_3$ )  $\delta_{\text{H}}$  : 2.42 (s, 3H,  $\text{CH}_3$ ), 4.36 (s, 1H, NH), 4.46 (s, 2H), 4.93 (s, 1H, CH), 6.35 (s, 1H, NH), 6.50 (t,  $J$  = 6.0 Hz, 2H), 6.75 (d,  $J$  = 6.1 Hz, 2H), 7.01-7.09 (m, 4H), 7.17-7.20 (m, 6H), 7.80 (d,  $J$  = 6.4 Hz, 2H),  $^{13}\text{C}$  NMR (75 MHz;  $\text{CDCl}_3$ )  $\delta_{\text{C}}$  : 21.0, 46.2, 57.8, 114.8, 114.8, 115.6, 115.8, 116.0, 116.2, 123.6, 123.6, 128.2, 128.3, 128.4, 130.1, 132.6, 133.1, 136.5, 143.1, 143.1, 143.3, 143.4, 143.5, 143.7, 156.9, 159.8. Analysis calculated for :  $\text{C}_{28}\text{H}_{24}\text{ClF}_2\text{N}_3\text{O}_2\text{S}$ , C 62.28, H 4.48, N 7.78, Found: C 62.18, H 4.32, N 7.89.

**N-Tert-butyl-2-(4-chlorophenyl)-N'-(3-methoxyphenyl)-2-(3-methoxyphenylamino)acetimidamide (5g)**

Solid, ESI MS ( $m/z$ ) = 452 (M+H), IR (KBr)  $\nu_{\text{max}}$  : 3359, 2965, 2828, 1616, 1590, 1495, 1291, 1214, 1170, 1099, 748  $\text{cm}^{-1}$ .  $^1\text{H}$  NMR (300 MHz;  $\text{CDCl}_3$ )  $\delta_{\text{H}}$  : 1.51 (s, 9H), 3.67 (s, 3H,  $\text{OCH}_3$ ), 3.80 (s, 3H,  $\text{OCH}_3$ ), 4.39 (s, 1H, NH), 4.50 (s, 1H, CH), 5.99 (s, 1H, NH), 6.29 (d,  $J$  = 8.6 Hz, 1H), 6.47 (d,  $J$  = 7.9 Hz, 1H), 6.64 (s, 1H), 6.74 (d,  $J$  = 7.6 Hz, 1H), 6.82-6.88 (m, 2H), 7.20 (dd,  $J$  = 7.2, 16.0, Hz, 4H), 7.31 (t,  $J$  = 5.3 Hz, 2H),  $^{13}\text{C}$  NMR (50 MHz;  $\text{CDCl}_3$ )  $\delta_{\text{C}}$  : 29.6, 52.9, 55.1, 55.4, 58.1, 100.7, 104.9, 105.8, 106.0, 106.0, 106.3, 106.9, 116.3, 127.8,

128.1, 128.2, 128.4, 129.6, 130.0, 132.8, 137.4, 147.3, 149.9, 157.5, 158.9. Analysis calculated for :  $C_{26}H_{30}ClN_3O_2$ , C 69.09, H 6.69, N 9.30, Found : C 69.18, H 6.78, N 9.18.

**2-(4-Bromophenyl)-N-*tert*-butyl-N'-(3-methoxyphenyl)-2-(3-methoxyphenylamino)acetimidamide (5h)**

Solid, ESI MS ( $m/z$ ) = 496 (M+H), IR (KBr)  $\nu_{max}$  : 3380, 3362, 2958, 1637, 1595, 1508, 1481, 1329, 749  $cm^{-1}$ .  $^1H$  NMR (300 MHz;  $CDCl_3$ )  $\delta_H$  : 1.49 (s, 9H), 3.67 (s, 3H,  $OCH_3$ ), 3.84 (s, 3H,  $OCH_3$ ), 4.31 (s, 1H, NH), 4.48 (s, 1H, CH), 6.04 (s, 1H, NH), 6.27 (d,  $J = 5.0$  Hz, 1H), 6.47 (d,  $J = 6.9$  Hz, 1H), 6.64 (s, 1H), 6.74 (d,  $J = 6.0$  Hz, 1H), 6.81-6.88 (m, 2H), 7.21 (d,  $J = 6.5$  Hz, 2H), 7.33 (t,  $J = 6.5$  Hz, 2H), 7.51 (d,  $J = 6.7$  Hz, 2H).  $^{13}C$  NMR (50 MHz;  $CDCl_3$ )  $\delta_C$  : 29.8, 52.9, 55.2, 55.5, 57.9, 101.7, 105.9, 105.8, 106.0, 106.0, 106.3, 106.9, 116.3, 122.7, 128.4, 129.6, 130.0, 131.5, 138.2, 147.3, 150.1, 159.9. Analysis calculated for :  $C_{26}H_{30}BrN_3O_2$ , C 62.90, H 6.09, N 8.46, Found: C 62.98, H 5.99, N 8.34.

**N-Tert-butyl-2-(4-chlorophenyl)-N'-(4-methoxyphenyl)-2-(4-methoxyphenylamino)acetimidamide (5i)**

Solid, ESI MS ( $m/z$ ) = 452 (M+H), IR (KBr)  $\nu_{max}$  : 3319, 3050, 2870, 2760, 2150, 1630, 752  $cm^{-1}$ .  $^1H$  NMR (300 MHz;  $CDCl_3$ )  $\delta_H$  : 1.51 (s, 9H), 3.75 (s, 3H,  $OCH_3$ ), 3.80 (s, 3H,  $OCH_3$ ), 4.38 (s, 1H, NH), 4.70 (s, 1H, CH), 6.03 (s, 1H, NH), 6.20 (d,  $J = 3.2$  Hz, 1H), 6.71 (t,  $J = 1.3$  Hz, 1H), 6.74-6.87 (m, 4H), 6.98-7.23 (m, 4H), 7.26 (t,  $J = 2.6$  Hz, 2H).  $^{13}C$  NMR (75 MHz;  $CDCl_3$ )  $\delta_C$  : 29.9, 52.1, 55.3, 56.1, 113.8, 113.9, 114.1, 122.7, 127.7, 128.1, 128.1, 128.4, 132.6, 137.4, 139.1, 142.9, 154.7, 155.1, 158.6. Analysis calculated for :  $C_{26}H_{30}ClN_3O_2$ , C 69.09, H 6.69, N 9.30; Found : C 68.97, H 6.76, N 9.21.

**N-Cyclohexyl-2-(4-fluorophenyl)-N'-(4-methoxyphenyl)-2-(4-methoxyphenylamino)acetimidamide (5j)**

Solid, ESI MS ( $m/z$ ) = 462 (M+H), IR (KBr)  $\nu_{max}$  : 3356, 2935, 2852, 1640, 1428, 1255, 1095, 1012, 747  $cm^{-1}$ .  $^1H$  NMR (300 MHz;  $CDCl_3$ )  $\delta_H$  : 1.11-1.14 (m, 5H), 1.15 (t,  $J = 5.6$  Hz, 2H), 1.17 (t,  $J = 11.9$  Hz, 3H), 2.12 (t,  $J = 5.4$  Hz, 1H), 3.72 (s, 3H,  $OCH_3$ ), 3.79 (s, 3H,  $OCH_3$ ), 4.25 (s, 1H, NH), 4.71 (s, 1H, CH), 6.10 (br, s, 1H, NH), 6.34 (br, s, 1H), 6.74 (t,  $J = 6.3$  Hz, 1H), 6.72-6.94 (m, 4H), 6.97 (d,  $J = 6.8$  Hz, 4H), 7.29 (d,  $J = 5.4$  Hz, 2H).  $^{13}C$  NMR (75 MHz;  $CDCl_3$ )  $\delta_C$  : 25.2, 26.8, 33.8, 53.9, 55.3, 56.8, 113.9, 114.1, 114.7, 114.9, 122.9, 128.2, 128.3, 134.1, 134.1, 141.3, 141.5, 141.7, 154.7, 158.2. Analysis calculated for :  $C_{28}H_{32}FN_3O_2$ , C 72.86, H 6.99, N 9.10, Found : C 72.76, H 7.09, N 9.21.

**N-Cyclohexyl-N'-(2,4-dimethylphenyl)-2-(2,4dimethylphenylamino)-2-phenylacetimidamide (5k)**

Solid, ESI MS ( $m/z$ ) = 440 (M+H), IR (KBr)  $\nu_{\max}$  : 3355, 2934, 2855, 2870, 1640, 1600, 14292, 1256, 1091, 1013, 754  $\text{cm}^{-1}$ .  $^1\text{H}$  NMR (300 MHz;  $\text{CDCl}_3$ )  $\delta_{\text{H}}$  : 1.28-1.60 (m, 6H), 1.68 (t,  $J = 6.3$  Hz, 5H), 2.16 (s, 6H,  $\text{CH}_3$ ), 2.30 (s, 6H,  $\text{CH}_3$ ), 4.08 (br, s, 1H, NH), 4.33 (br, s, 1H, CH), 5.32 (br, s, 1H, NH), 6.25 (d,  $J = 7.5$  Hz, 1H), 6.51 (d,  $J = 7.2$  Hz, 1H), 6.68 (s, 1H), 6.74 (d,  $J = 7.7$  Hz, 1H), 6.84 (d,  $J = 9.2$  Hz, 2H), 7.01 (s, 1H), 7.45 (d,  $J = 8.5$  Hz, 2H), 8.01 (d,  $J = 8.4$  Hz, 2H).  $^{13}\text{C}$  NMR (50 MHz;  $\text{CDCl}_3$ )  $\delta_{\text{C}}$  : 17.7, 18.1, 20.5, 20.9, 25.4, 26.5, 33.3, 53.8, 56.3, 112.8, 119.6, 122.6, 125.3, 127.1, 127.4, 127.6, 127.7, 128.9, 130.3, 131.8, 132.1, 133.2, 140.6, 142.2, 142.5, 154.5, 159.6. Analysis calculated for :  $\text{C}_{30}\text{H}_{37}\text{N}_3$ , C 81.96, H 8.48, N 9.56, Found : C 82.04, H 8.41, N 9.49.

**N'-(4-Chlorophenyl)-2-(4-chlorophenylamino)-N-cyclohexyl-2-(pyridin-4-yl)acetimidamid (5l)**

Solid, ESI MS ( $m/z$ ) = 453 (M+H), IR (KBr)  $\nu_{\max}$  : 3356, 2939, 2850, 2875, 1645, 1430, 1255, 1093, 1013, 756  $\text{cm}^{-1}$ .  $^1\text{H}$  NMR (300 MHz;  $\text{CDCl}_3$ )  $\delta_{\text{H}}$  : 1.22-1.55 (m, 5H), 1.67 (d,  $J = 13.9$  Hz, 3H), 1.72 (br, s, 2H), 2.12 (t,  $J = 5.4$  Hz, 1H), 4.36 (s, 1H, NH), 4.55 (s, 1H, CH), 6.24 (s, 1H, NH), 6.48 (d,  $J = 6.1$  Hz, 2H), 6.79 (d,  $J = 6.1$  Hz, 2H), 7.08 (d,  $J = 6.1$  Hz, 2H), 7.23-7.28 (m, 4H), 8.50 (d,  $J = 4.5$  Hz, 2H).  $^{13}\text{C}$  NMR (75 MHz;  $\text{CDCl}_3$ )  $\delta_{\text{C}}$  : 25.4, 26.4, 32.8, 53.9, 55.9, 114.0, 122.6, 123.6, 125.0, 129.3, 129.4, 130.4, 144.8, 146.5, 146.6, 149.9, 159.9. Analysis calculated for :  $\text{C}_{25}\text{H}_{26}\text{Cl}_2\text{N}_4$ , C 66.23, H 5.78, N 12.36, Found : C 66.31, H 5.67, N 12.45.

**N-Tert-butyl-N'-phenyl-2-(phenylamino)-2-(pyridin-4-yl)acetimidamide (5m)**

Solid, ESI MS ( $m/z$ ) = 359 (M+H), IR (KBr)  $\nu_{\max}$  : 3360, 2940, 2853, 2870, 1648, 1435, 1260, 1093, 1019, 752  $\text{cm}^{-1}$ .  $^1\text{H}$  NMR (300 MHz;  $\text{CDCl}_3$ )  $\delta_{\text{H}}$  : 1.51, (s, 9H), 4.28 (s, 1H, NH), 4.69 (s, 1H, CH), 6.10 (s, 1H, NH), 6.51 (d,  $J = 5.7$  Hz, 2H), 6.68 (t,  $J = 5.6$  Hz, 1H), 6.94 (d,  $J = 1.0$  Hz, 2H), 7.08-7.12 (m, 3H), 7.28 (d,  $J = 4.4$  Hz, 2H), 7.41 (t,  $J = 5.6$  Hz, 2H), 8.50 (d,  $J = 4.5$  Hz, 2H).  $^{13}\text{C}$  NMR (75 MHz;  $\text{CDCl}_3$ )  $\delta_{\text{C}}$  : 29.6, 52.0, 56.3, 112.1, 118.9, 120.0, 123.4, 128.8, 128.9, 146.0, 146.8, 148.3, 149.8, 158.8. Analysis calculated for :  $\text{C}_{23}\text{H}_{26}\text{N}_4$ , C 77.06, H 7.31, N 15.63, Found : C 76.98, H 7.38, N 15.58.

**N,2-Bis(4-chlorophenyl)-2-(4-chlorophenylamino)-N-(2-morpholinoethyl)acetimidamide (5n)**

Solid, ESI MS ( $m/z$ ) = 517 (M+H), IR (KBr)  $\nu_{\max}$  : 3359, 2947, 2855, 2868, 1640, 1433, 1261, 1019, 754  $\text{cm}^{-1}$ .  $^1\text{H}$  NMR (300 MHz; DMSO- $d_6$ )  $\delta_{\text{H}}$  : 2.19 (t,  $J$  = 5.1 Hz, 2H), 2.29 (s, 4H), 3.51 (t,  $J$  = 4.3 Hz, 2H), 3.70 (s, 4H), 4.45 (s, 1H, NH), 5.10 (s, 1H, CH), 5.94 (s, 1H, NH), 6.51 (d,  $J$  = 5.7 Hz, 2H), 6.66 (t,  $J$  = 4.6 Hz, 2H), 6.91 (d,  $J$  = 5.0 Hz, 2H), 7.08 (d,  $J$  = 5.2 Hz, 2H), 7.29 (t,  $J$  = 3.9 Hz, 1H), 7.40 (t,  $J$  = 1.3 Hz, 3H).  $^{13}\text{C}$  NMR (75 MHz; DMSO- $d_6$ )  $\delta_{\text{C}}$  : 59.6, 62.0, 62.5, 69.3, 114.2, 122.6, 125.0, 128.3, 128.6, 129.0, 129.3, 130.4, 132.6, 137.0, 144.8, 146.2, 157.9. Analysis calculated for :  $\text{C}_{26}\text{H}_{27}\text{Cl}_3\text{N}_4\text{O}$ , C 60.30, H 5.26, N 10.82, Found : C 60.42, H 5.14, N 10.76.

**N-Tert-butyl-2-phenyl-2-(phenylamino)acetamide (6a)**

Oily, ESI MS ( $m/z$ ) = 283 (M+H), IR (KBr)  $\nu_{\max}$  : 3382, 1641, 1531, 1473, 749,  $\text{cm}^{-1}$ .  $^1\text{H}$  NMR (300 MHz;  $\text{CDCl}_3$ )  $\delta_{\text{H}}$  : 1.49 (s, 9H), 4.49 (s, 1H, NH), 4.95 (s, 1H, CH), 6.06 (s, 1H, NH), 6.57 (d,  $J$  = 5.7 Hz, 2H), 6.66 (t,  $J$  = 5.5 Hz, 1H), 6.98 (d,  $J$  = 3.7 Hz, 2H), 7.14 (t,  $J$  = 5.8 Hz, 2H), 7.28 (m, 3H).  $^{13}\text{C}$  NMR (75 MHz;  $\text{CDCl}_3$ )  $\delta_{\text{C}}$  : 29.0, 49.6, 63.3, 113.7, 119.4, 127.4, 127.8, 127.8, 128.0, 128.8, 128.9, 139.2, 146.8, 169.7. Analysis calculated for:  $\text{C}_{18}\text{H}_{22}\text{N}_2\text{O}$ : C 76.56, H 7.85, N 9.92, Found : C 76.42, H 7.97, N 9.81.

**N-Cyclohexyl-2-(2,4-dimethylphenylamino)-2-phenylacetamide (6k)**

Solid, ESI MS ( $m/z$ ) = 337 (M+H), IR (KBr)  $\nu_{\max}$  : 3374, 1633, 1531, 1475, 749  $\text{cm}^{-1}$ .  $^1\text{H}$  NMR (300 MHz;  $\text{CDCl}_3$ )  $\delta_{\text{H}}$  : 1.18-1.49 (m, 6H), 1.58 (d,  $J$  = 16.8 Hz, 4H), 2.28 (s, 6H,  $\text{CH}_3$ ), 3.59-3.79 (m, 1H), 4.07 (s, 1H, NH), 4.53 (s, 1H, CH), 6.03 (s, 1H, NH), 6.35 (d,  $J$  = 3.4 Hz, 1H), 6.76 (s, 1H), 6.84 (d,  $J$  = 6.09 Hz, 1H), 7.01 (d,  $J$  = 4.71 Hz, 2H), 7.32 (t,  $J$  = 5.52 Hz, 3H).  $^{13}\text{C}$  NMR (75 MHz;  $\text{CDCl}_3$ )  $\delta_{\text{C}}$  : 18.3, 20.5, 25.2, 26.3, 32.8, 49.8, 62.4, 113.2, 122.4, 127.7, 127.8, 128.0, 128.9, 130.8, 132.0, 139.1, 143.6, 170.1. Analysis calculated for:  $\text{C}_{22}\text{H}_{28}\text{N}_2\text{O}$ , C 78.53, H 8.39, N 8.33, Found : C 78.68, H 8.47, N 8.21.

**N-Tert-butyl-2-(4-chlorophenyl)-2-(4-methoxyphenylamino)acetamide (6i)**

Solid, ESI MS ( $m/z$ ) = 347 (M+H), IR (KBr)  $\nu_{\max}$  : 3383, 1639, 1535, 1478, 751  $\text{cm}^{-1}$ .  $^1\text{H}$  NMR (300 MHz;  $\text{CDCl}_3$ )  $\delta_{\text{H}}$  :  $\delta_{\text{H}}$  : 1.49 (s, 9H), 3.69 (s, 3H,  $\text{OCH}_3$ ), 4.45 (s, 1H, NH), 4.91 (s, 1H, CH), 6.03 (s, 1H, NH), 6.74 (dd,  $J$  = 6.6, 6.6 Hz, 4H), 7.06 (dd,  $J$  = 6.4, 6.3 Hz, 4H).  $^{13}\text{C}$  NMR (75 MHz;  $\text{CDCl}_3$ )  $\delta_{\text{C}}$  : 29.9, 49.8, 55.3, 63.1, 114.1, 114.5, 128.3, 128.5, 133.1, 137.0, 140.6, 153.8, 168.8. Analysis calculated for:  $\text{C}_{19}\text{H}_{23}\text{ClN}_2\text{O}_2$ , C 65.79, H 6.68, N 8.08, Found : C 65.86, H 6.78, N 7.98.



### **2-(4-Chlorophenyl)-N-cyclohexyl-2-(4-methoxyphenylamino)acetamide (6b)**

Solid, ESI MS ( $m/z$ ) = 373 (M+H), IR (KBr)  $\nu_{\max}$ : 3381, 1635, 1528, 1469, 756  $\text{cm}^{-1}$ .  $^1\text{H}$  NMR (300 MHz;  $\text{CDCl}_3$ )  $\delta_{\text{H}}$ : 1.13-1.28 (m, 5H), 1.45 (t,  $J = 4.31$  Hz, 3H), 1.65 (t,  $J = 10.6$  Hz, 2H), 3.39-3.61 (m, 1H), 3.67 (s, 3H,  $\text{OCH}_3$ ), 4.14 (s, 1H, NH), 4.43 (s, 1H, CH), 6.03 (s, 1H, NH), 6.76 (q,  $J = 6.6$  Hz, 4H), 7.06 (d,  $J = 6.2$  Hz, 2H), 7.16 (d,  $J = 6.3$  Hz, 2H).  $^{13}\text{C}$  NMR (75 MHz;  $\text{CDCl}_3$ )  $\delta_{\text{C}}$ : 25.2, 26.3, 32.8, 49.6, 55.3, 61.6, 114.1, 115.1, 128.6, 129.0, 133.1, 135.8, 140.9, 153.8, 169.5. Analysis calculated for:  $\text{C}_{21}\text{H}_{25}\text{ClN}_2\text{O}_2$ , C 67.64, H 6.76, N 7.51, Found : C 67.77, H 6.52, N 7.40.

### **2-(4-Bromophenyl)-N-tert-butyl-2-(3-methoxyphenylamino)acetamide (6h)**

Solid, ESI MS ( $m/z$ ) = 391(M+H), IR (KBr)  $\nu_{\max}$ : 3389, 1638, 1533, 1479, 747,  $\text{cm}^{-1}$ .  $^1\text{H}$  NMR (300 MHz;  $\text{CDCl}_3$ )  $\delta_{\text{H}}$ : 1.49 (s, 9H), 3.67 (s, 3H,  $\text{OCH}_3$ ), 4.39 (s, 1H, NH), 4.93 (s, 1H, CH), 6.01 (s, 1H, NH), 6.11 (s, 1H), 6.28 (d,  $J = 5.1$  Hz, 1H), 6.45 (d,  $J = 4.6$  Hz, 1H), 6.87 (d,  $J = 5.8$  Hz, 3H), 7.44 (d,  $J = 6.3$  Hz, 2H).  $^{13}\text{C}$  NMR (75 MHz;  $\text{CDCl}_3$ )  $\delta_{\text{C}}$ : 28.9, 49.4, 55.3, 63.1, 111.1, 114.3, 116.3, 122.4, 128.6, 129.6, 132.1, 138.2, 147.7, 141.8, 159.8, 169.5. Analysis calculated for :  $\text{C}_{19}\text{H}_{23}\text{BrN}_2\text{O}_2$ , C 58.32, H 5.92, N 7.16, Found : C 58.42, H 5.81, N 7.27.

### **2-Phenyl-2-(phenylamino)acetic acid (7a)**

Solid, ESI MS ( $m/z$ ) = 228 (M+H). IR (KBr)  $\nu_{\max}$ : 3400, 3331, 1671, 749  $\text{cm}^{-1}$ .  $^1\text{H}$  NMR (300 MHz  $\text{DMSO}-d_6$ )  $\delta_{\text{H}}$ : 4.33 (s, 1H, NH), 4.92 (s, 1H, CH), 6.29 (d,  $J = 5.7$  Hz, 2H), 6.69 (t,  $J = 1.0$  Hz, 1H), 7.14 (t,  $J = 5.7$  Hz, 2H), 7.30-7.35 (m, 5H), 8.31 (s, 1H).  $^{13}\text{C}$  NMR (75 MHz,  $\text{DMSO}-d_6$ )  $\delta_{\text{C}}$ : 60.3, 114.2, 119.4, 127.19, 127.7, 128.1, 128.3, 128.9, 129.3, 137.5, 145.8, 169.4. Analysis calculated for :  $\text{C}_{14}\text{H}_{13}\text{NO}_2$ , C 73.99, H 5.77, N 6.16, Found : C 74.09, H 5.62, N 6.25.

### **2-(2,4-Dimethylphenylamino)-2-phenylacetic acid (7k)**

Solid, ESI MS ( $m/z$ ) = 256 (M+H),  $^1\text{H}$  NMR (300 MHz,  $\text{DMSO}-d_6$ )  $\delta_{\text{H}}$ : 2.25 (s, 6H,  $\text{CH}_3$ ), 4.30 (s, 1H, NH), 4.90 (s, 1H, CH), 6.04 (d,  $J = 6.0$  Hz, 1H), 6.76 (s, 1H), 6.84 (d,  $J = 6.0$  Hz, 1H), 7.30-7.35 (m, 5H), 8.29 (s, 1H).  $^{13}\text{C}$  NMR (50 MHz,  $\text{DMSO}-d_6$ )  $\delta_{\text{C}}$ : 18.2, 20.5, 60.7, 113.8, 121.7, 127.9, 128.1, 128.8, 129.0, 130.8, 132.7, 137.94, 143.8, 169.7. Analysis calculated for :  $\text{C}_{16}\text{H}_{17}\text{NO}_2$ , C 75.27, H 6.71, N 5.49, Found : C 75.37, H 6.62, N 5.58.

### **2-(4-Chlorophenylamino)-2-(4-methoxyphenyl)acetic acid (7b)**

Solid, ESI MS ( $m/z$ ) = 292 (M+H), IR (KBr)  $\nu_{\max}$ : 3419, 3292, 1678, 748  $\text{cm}^{-1}$ .  $^1\text{H}$  NMR (300 MHz,  $\text{DMSO}-d_6$ )  $\delta_{\text{H}}$ : 3.67 (s, 3H,  $\text{OCH}_3$ ), 4.48 (s, 1H, NH), 4.83 (s, 1H, CH), 6.51 (d,  $J = 6.5$  Hz, 2H), 6.80 (d,  $J = 6.5$  Hz, 2H), 7.26 (d,  $J = 6.4$  Hz, 2H), 7.42 (d,  $J = 6.4$  Hz, 2H), 8.30 (s, 1H).  $^{13}\text{C}$  NMR (50 MHz,  $\text{DMSO}-d_6$ )  $\delta_{\text{C}}$ : 55.3, 59.6, 115.3, 116.1, 128.5, 128.8, 129.2,



130.3, 133.6, 135.7, 141.4, 154.8, 170.3. Analysis calculated for :  $C_{15}H_{14}ClNO_3$ , C 61.76, H 4.84, N 4.80, Found : C 61.85, H 4.73, N 4.93.

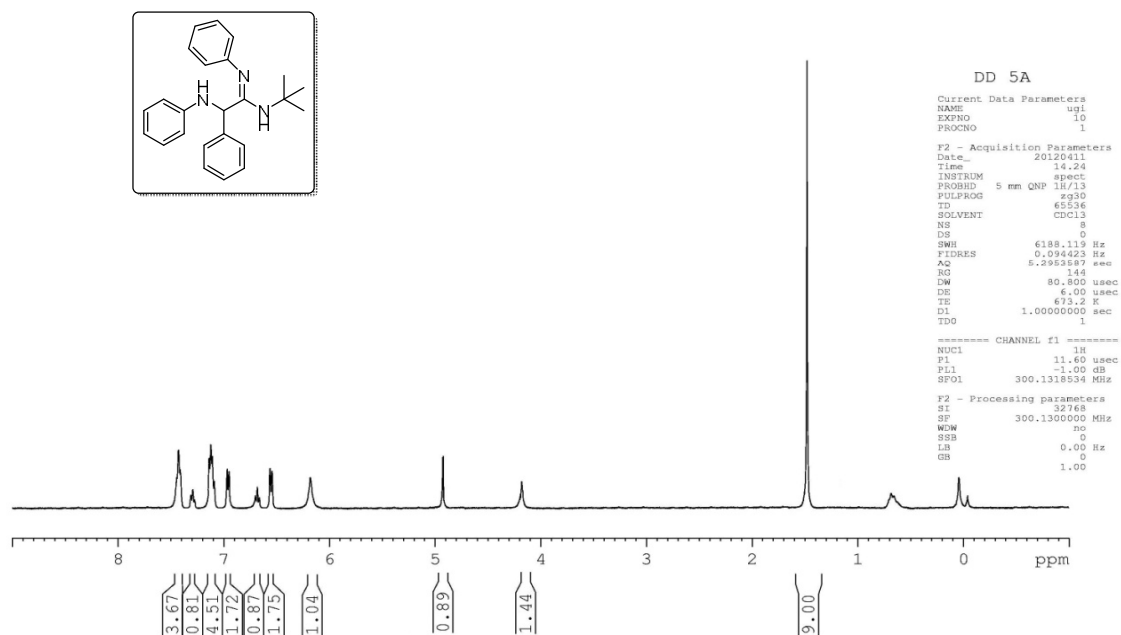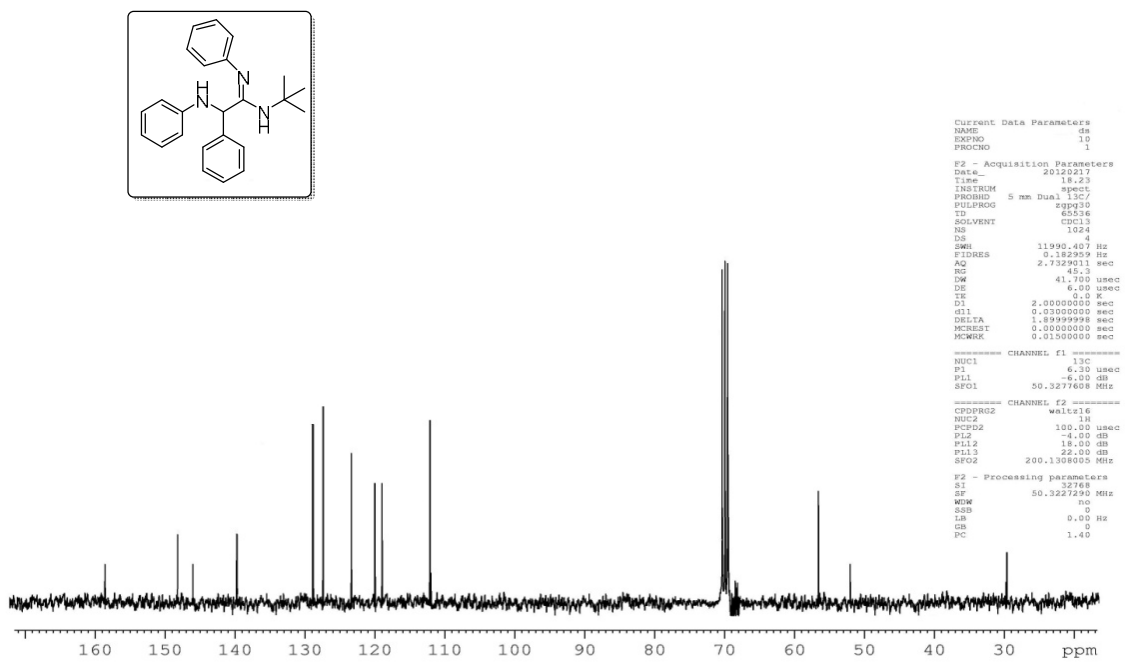

Fig. 1 (5a)

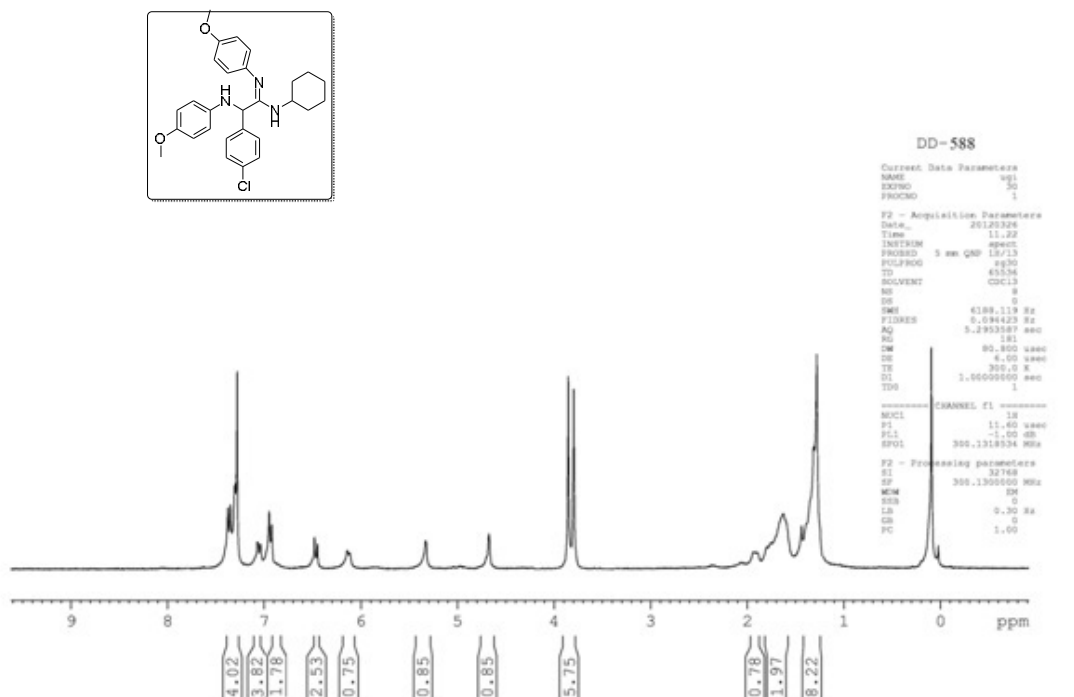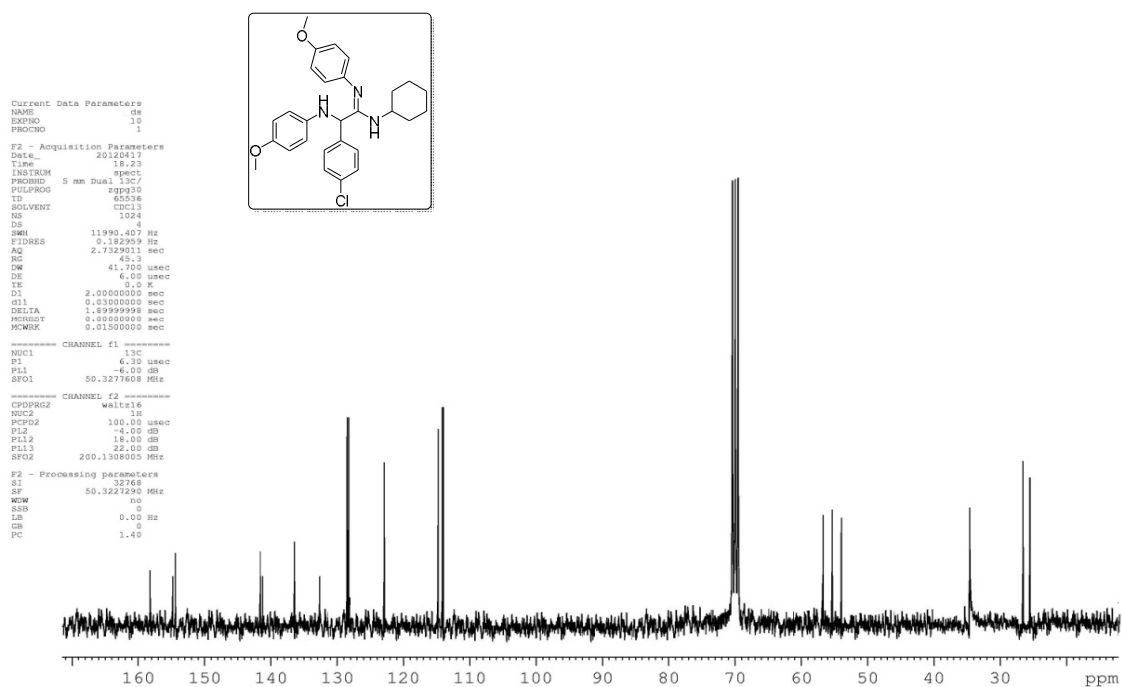

Fig. 2 (5b)



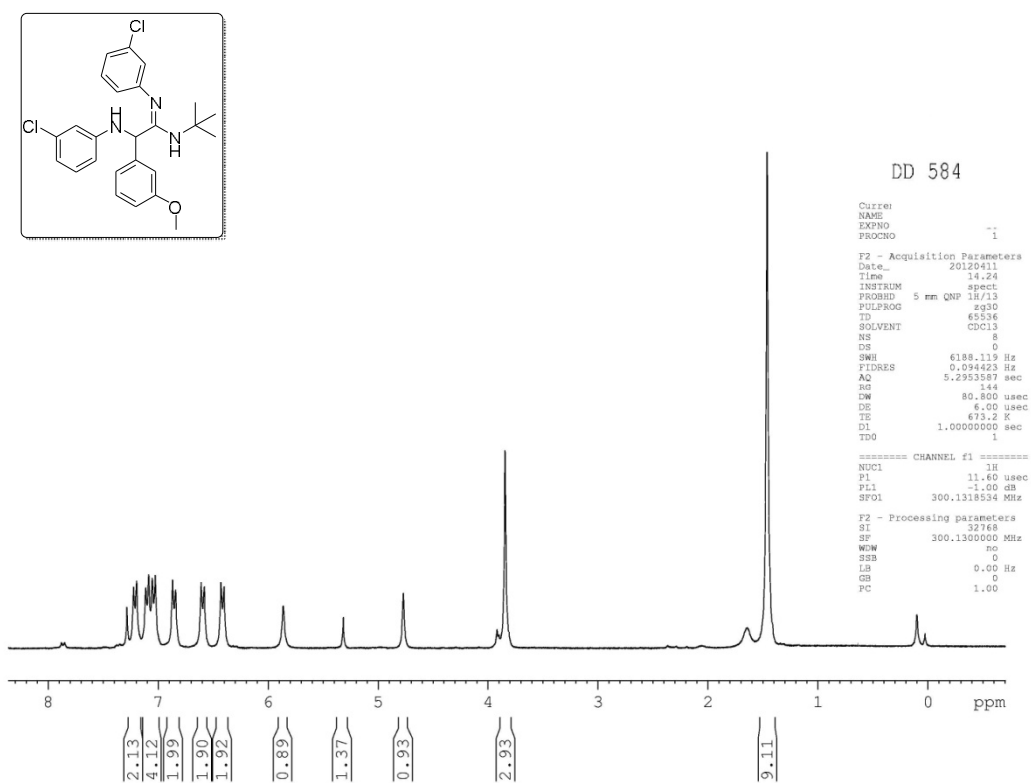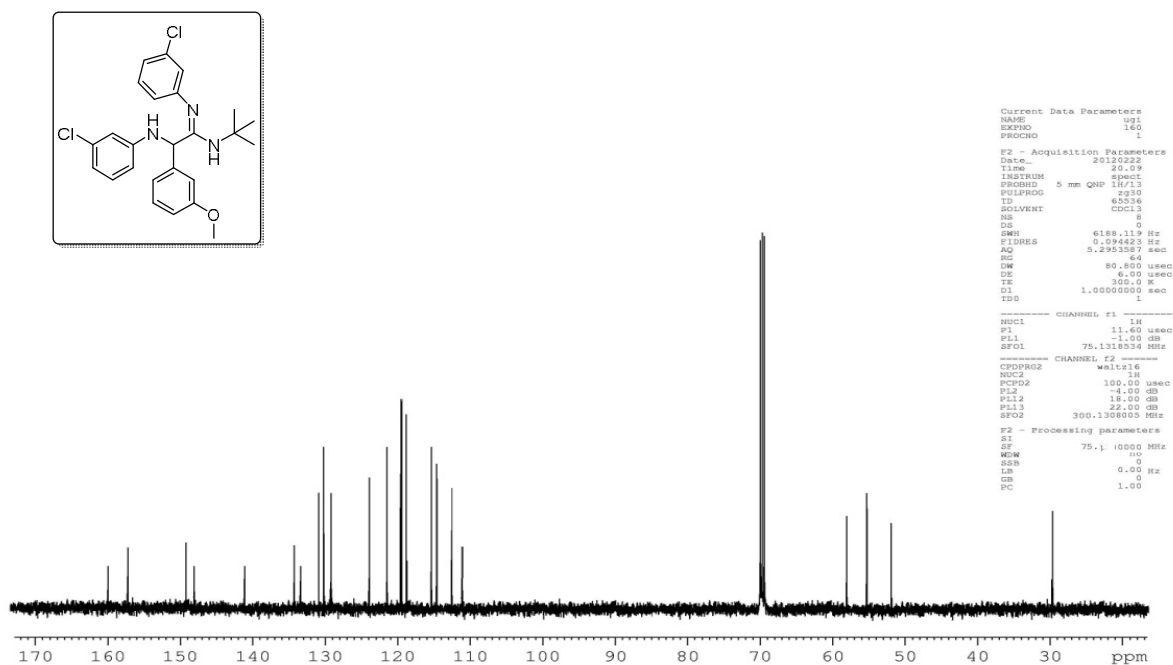

Fig. 4 (5d)

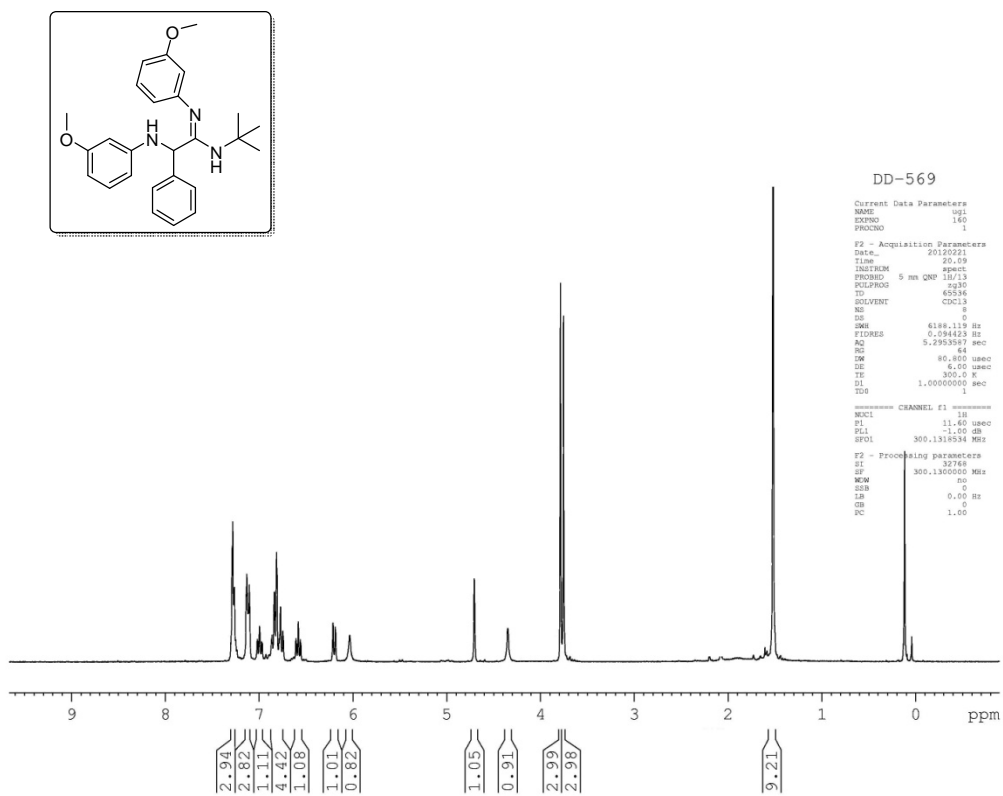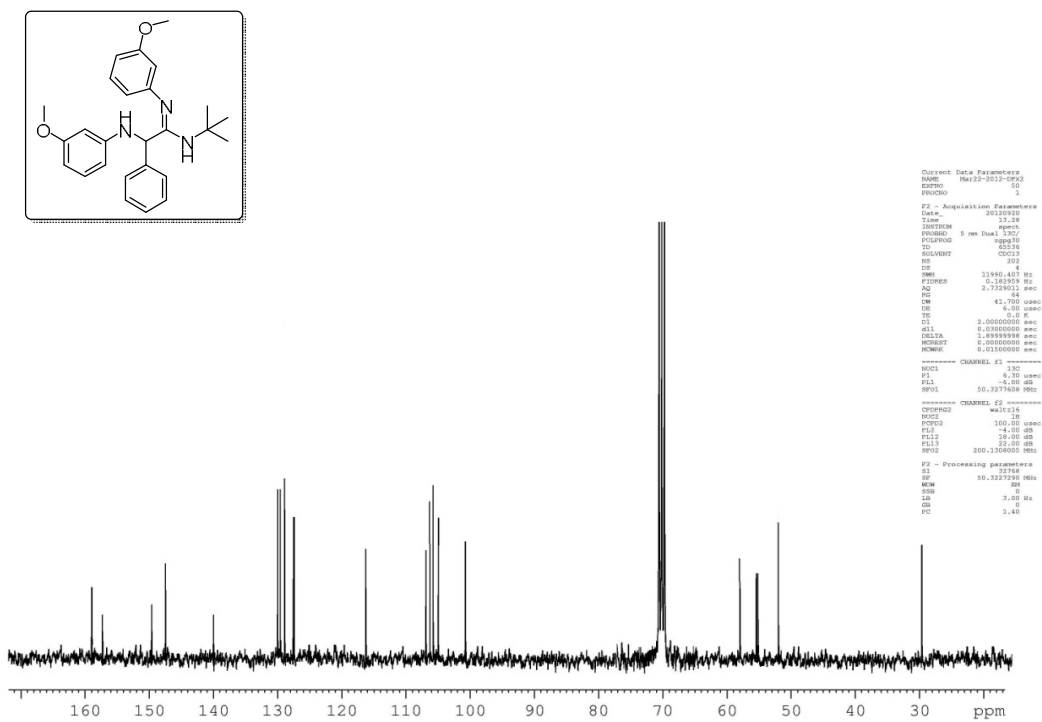

Fig. 5 (5e)

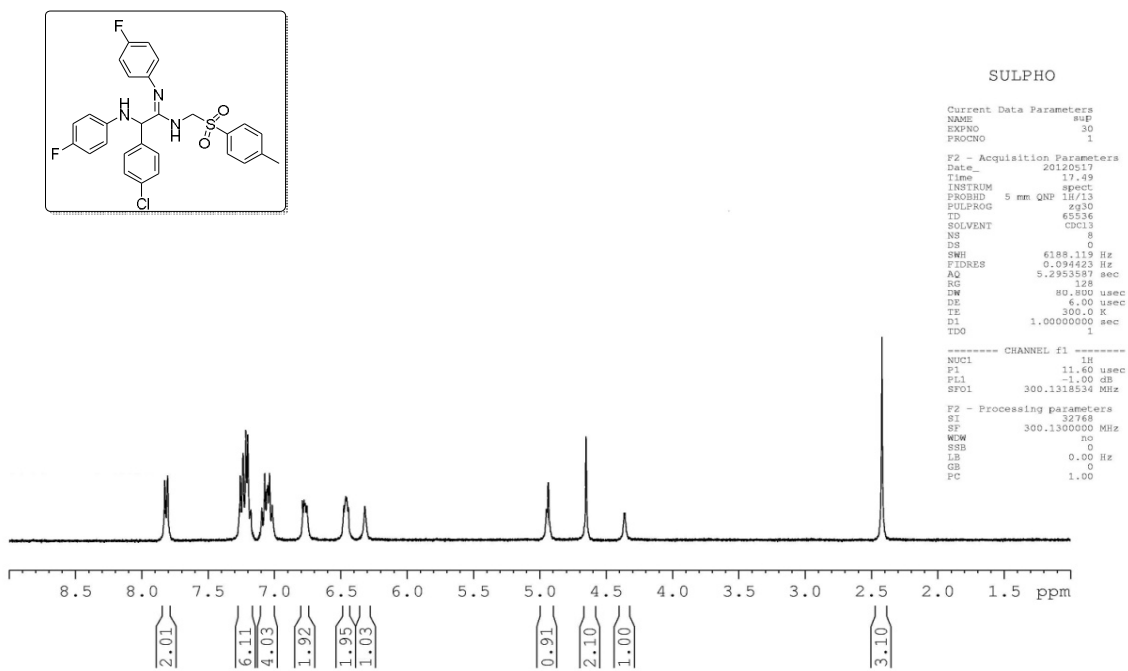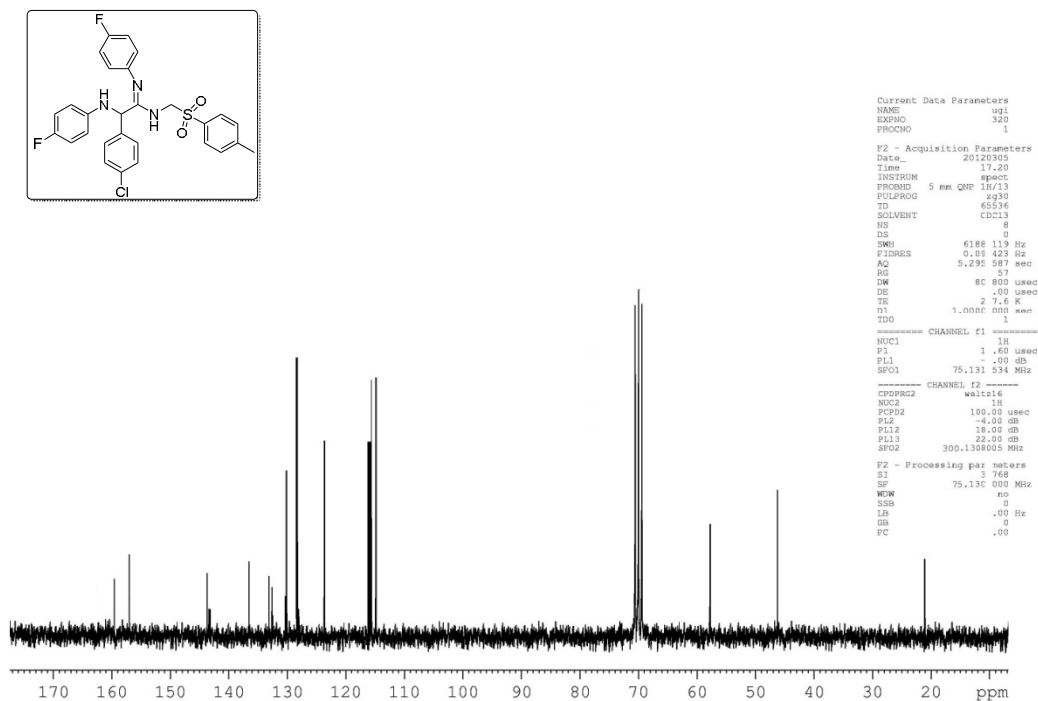

Fig. 6 (5f)



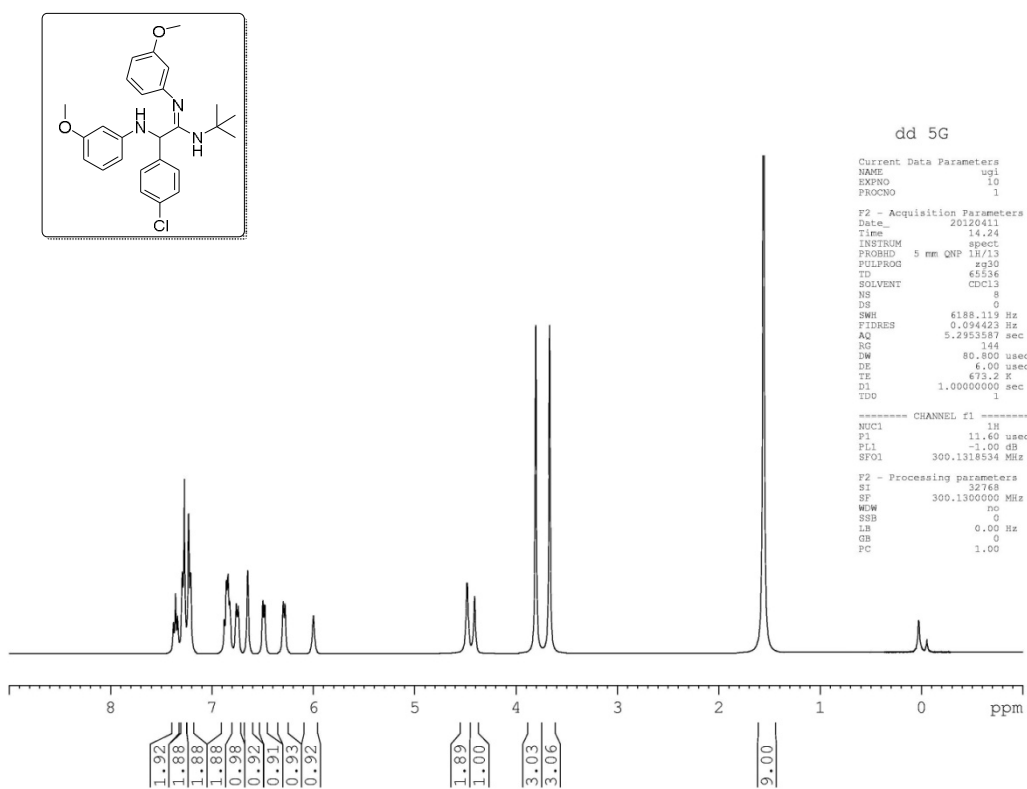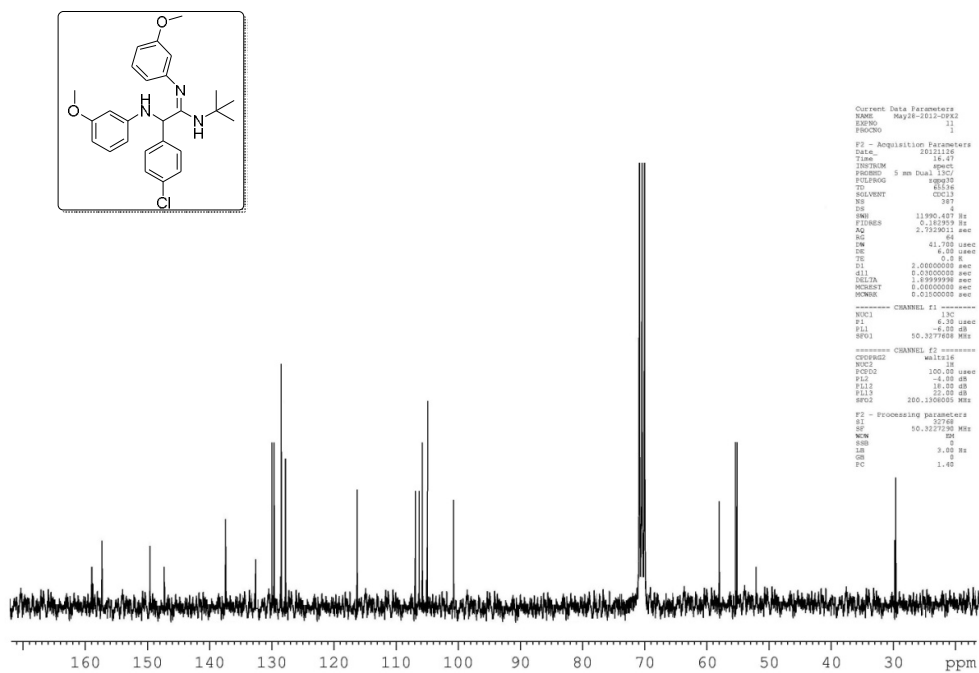

Fig. 7 (5g)

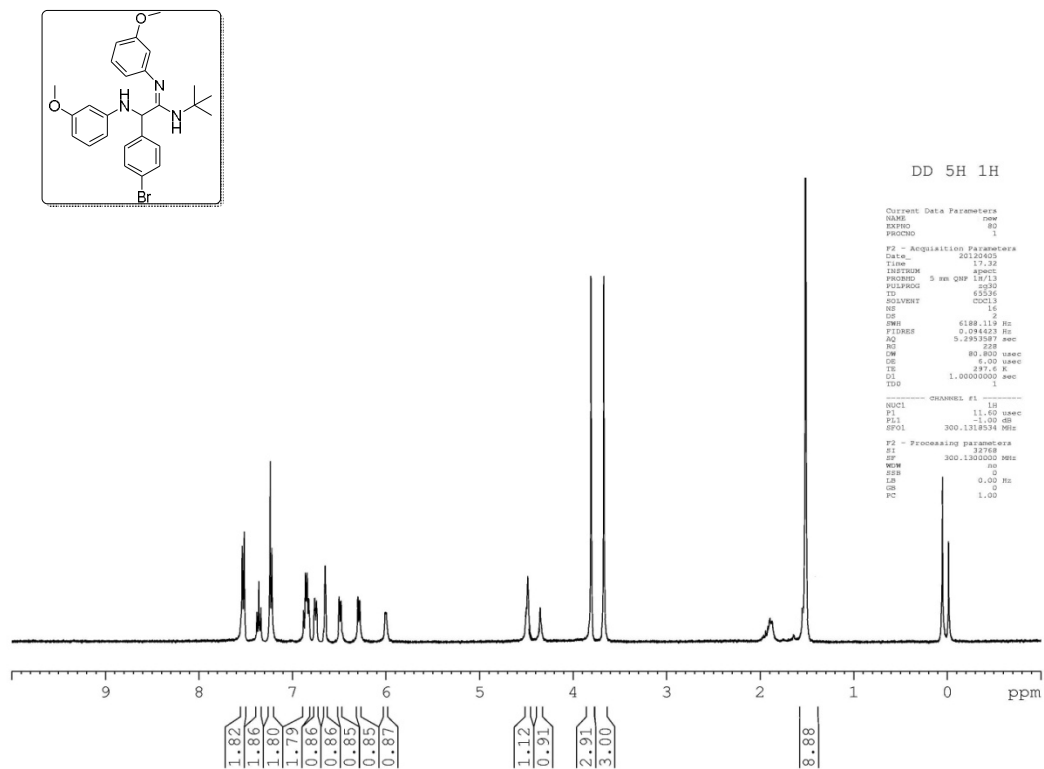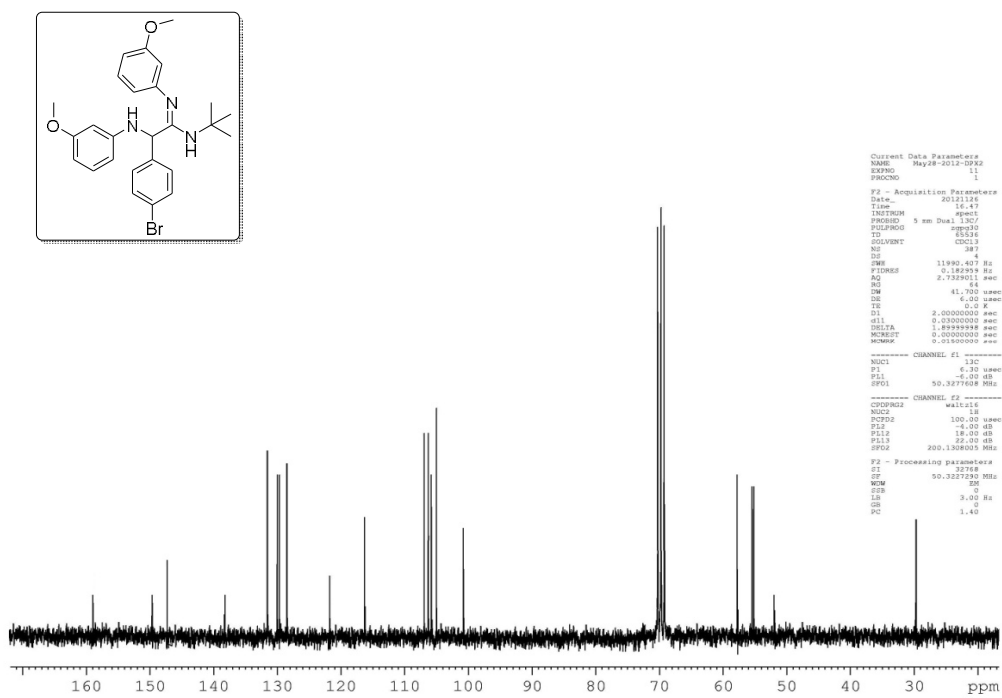

Fig. 8 (5h)

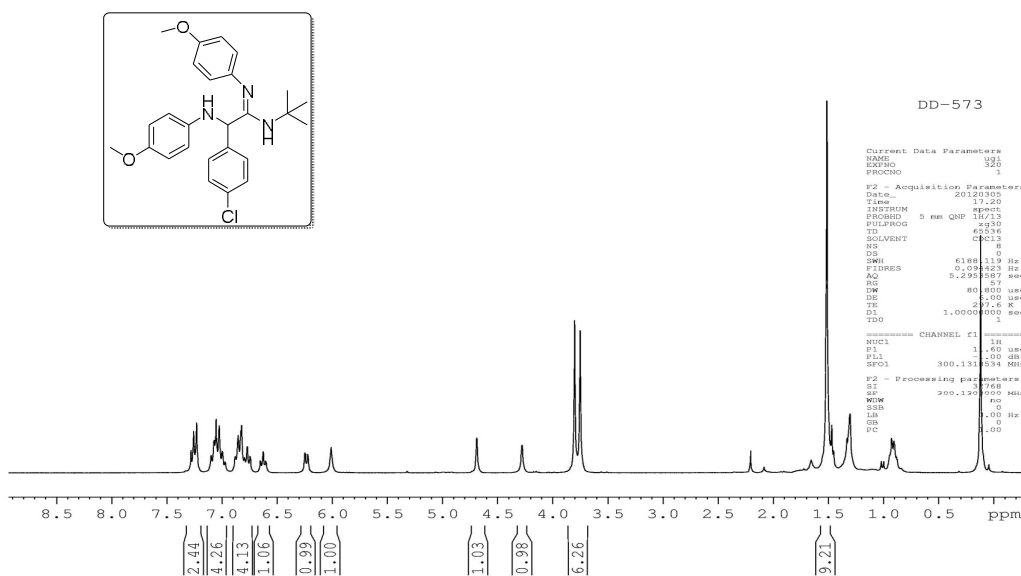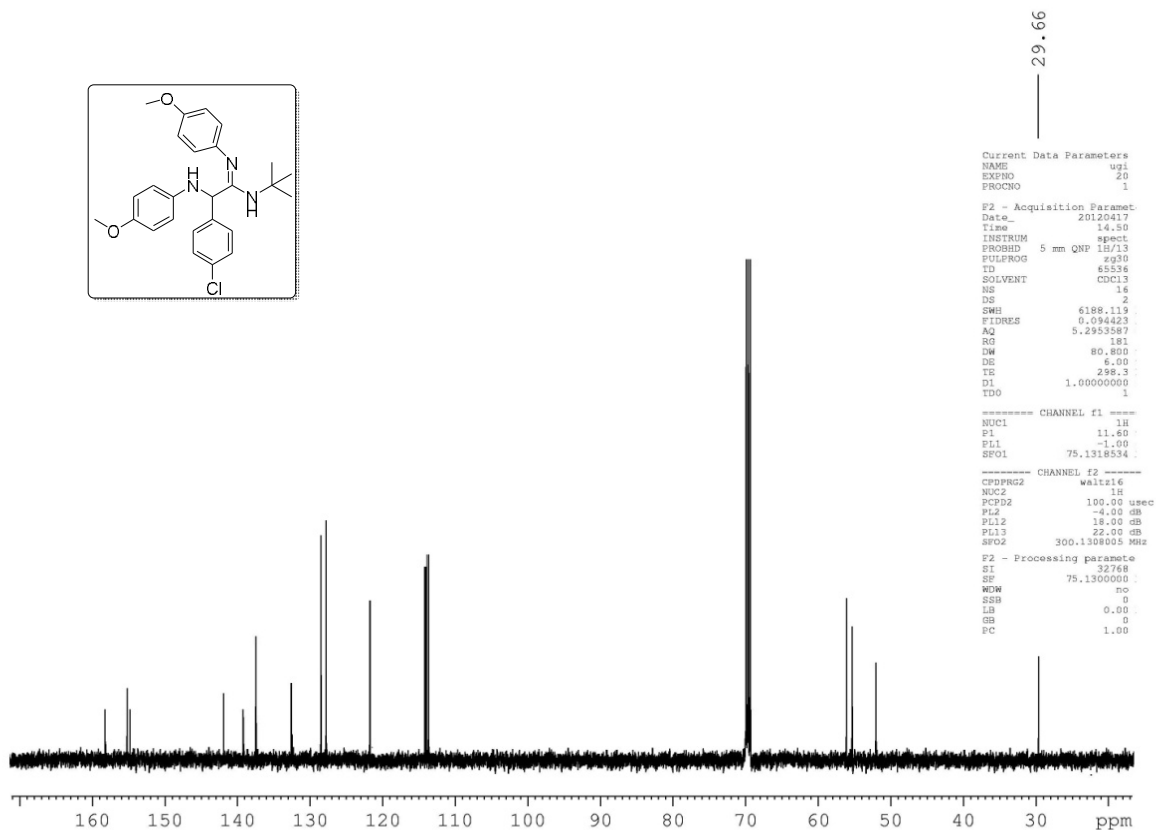

Fig. 9 (5i)

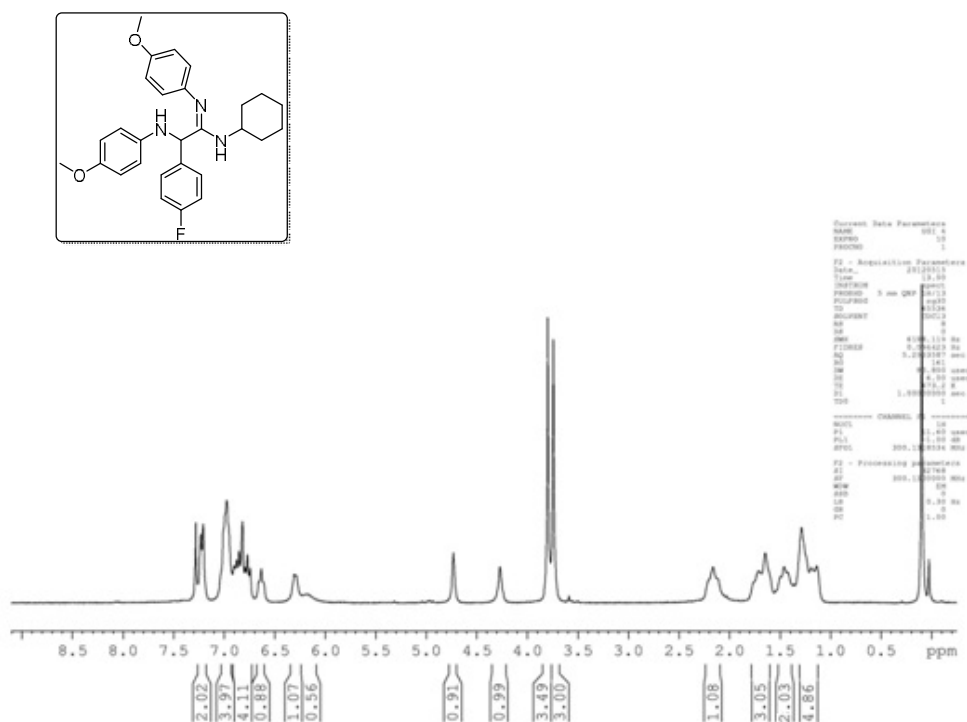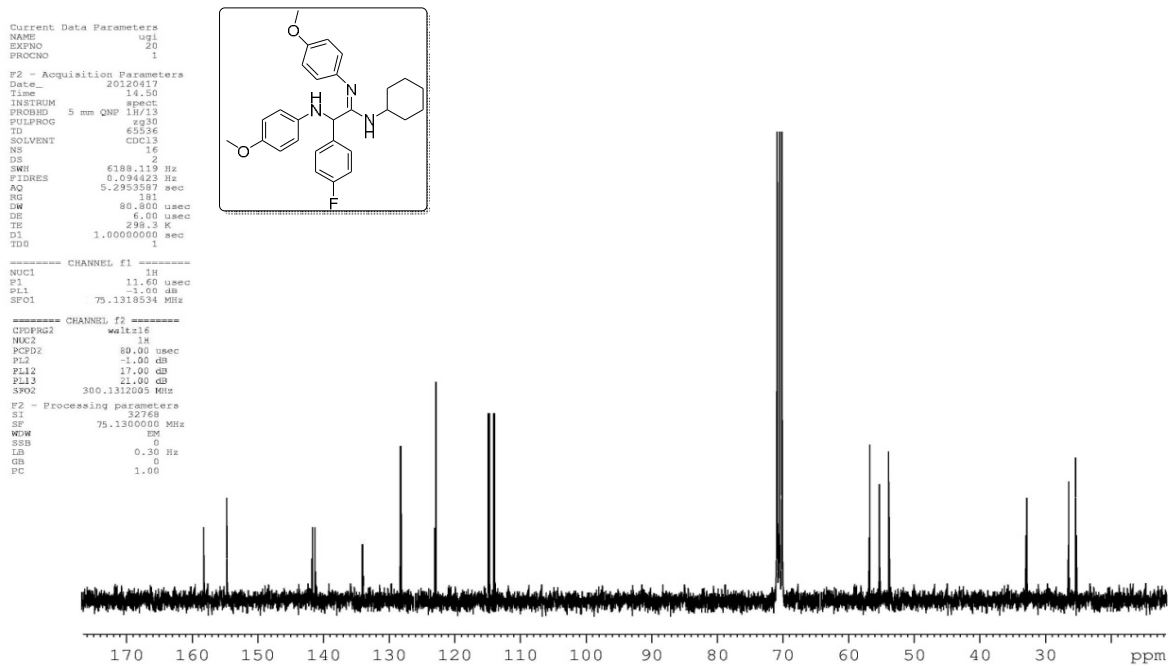

Fig. 10 (5j)

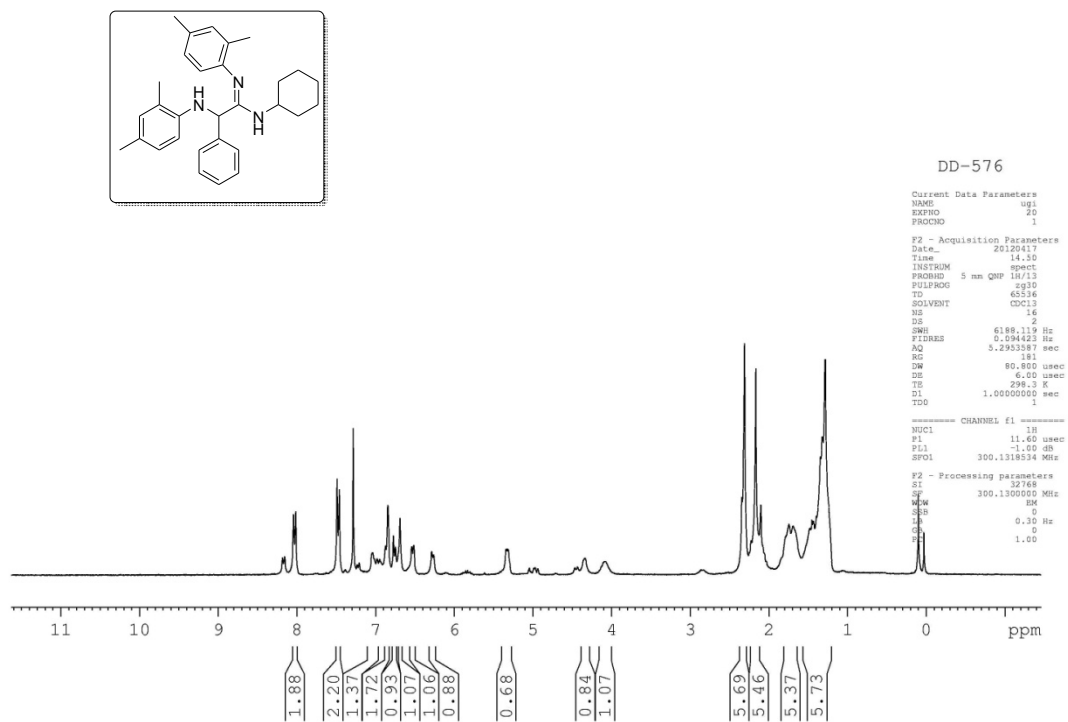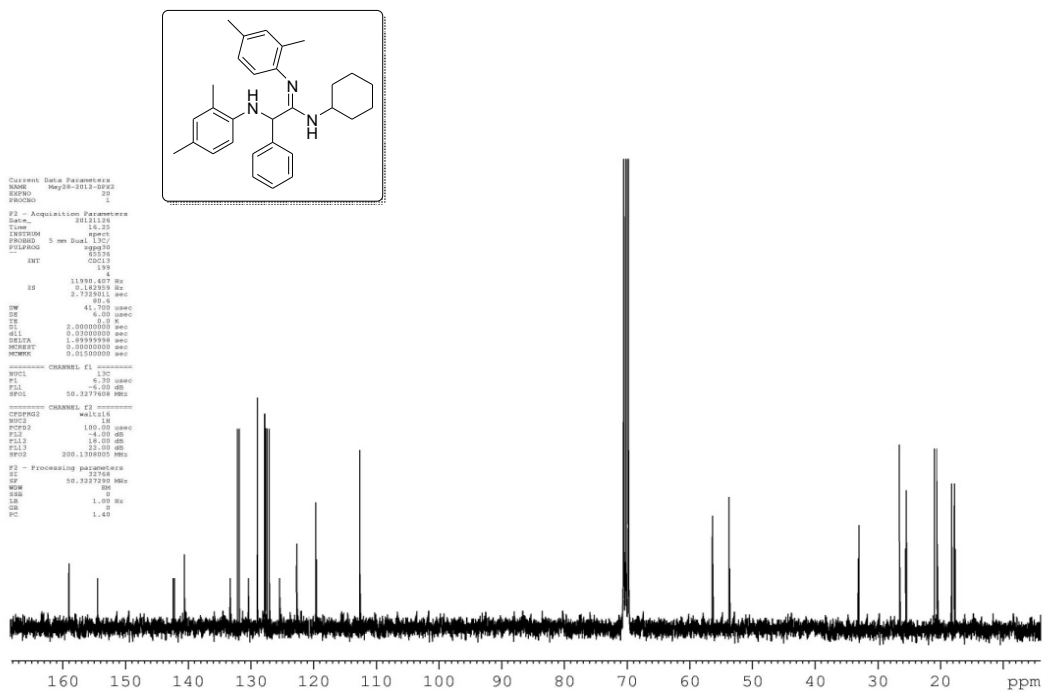

Fig. 11 (5k)

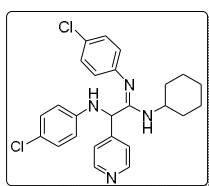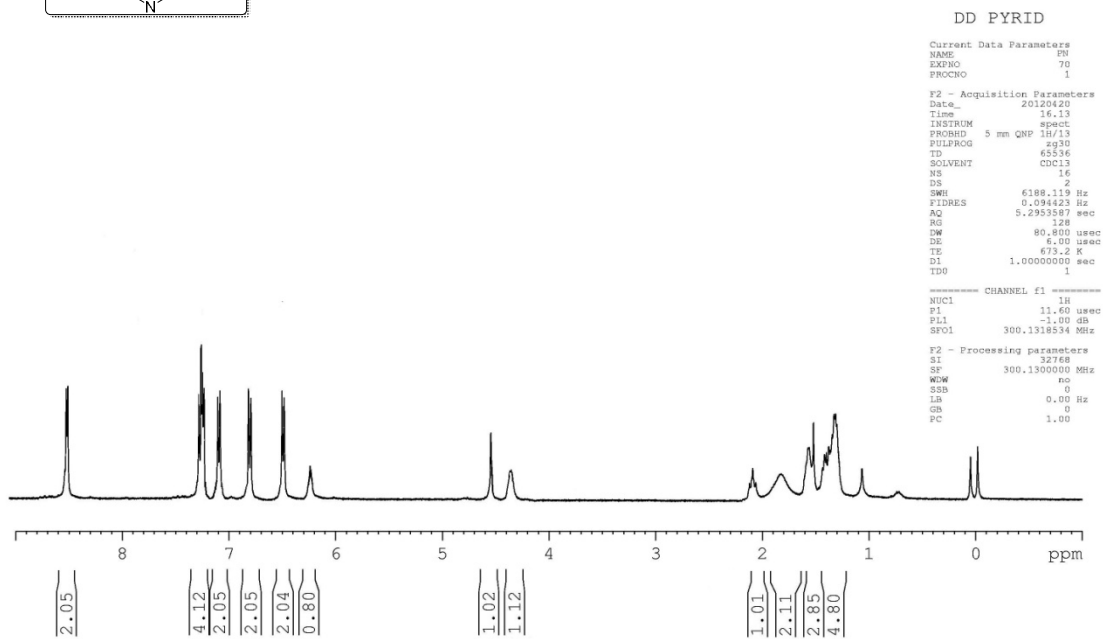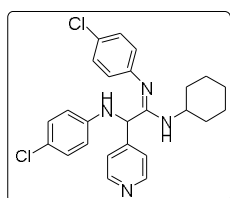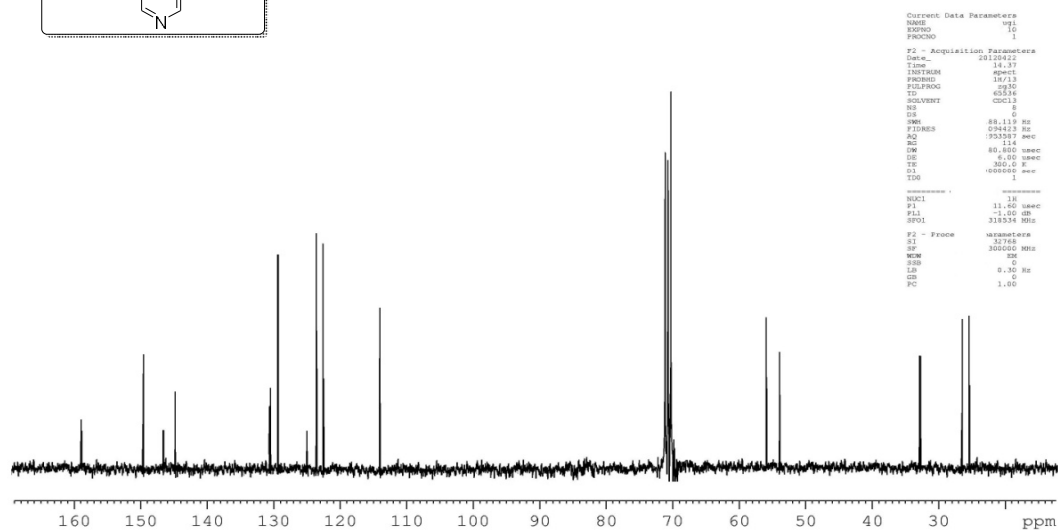

Fig. 12(51)

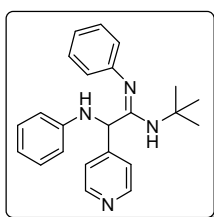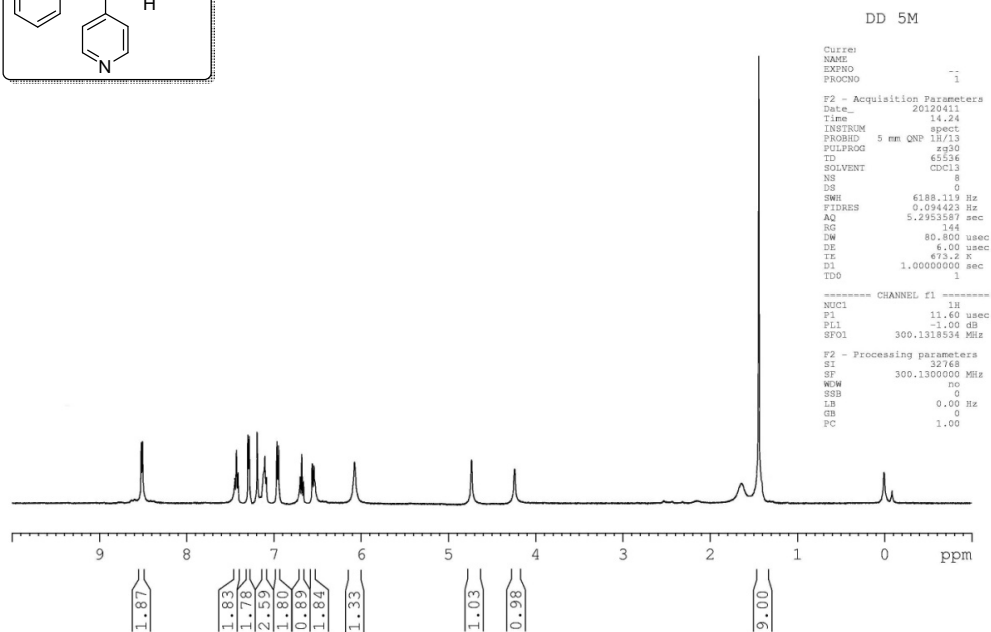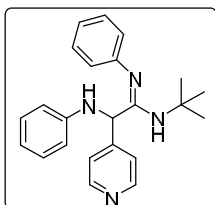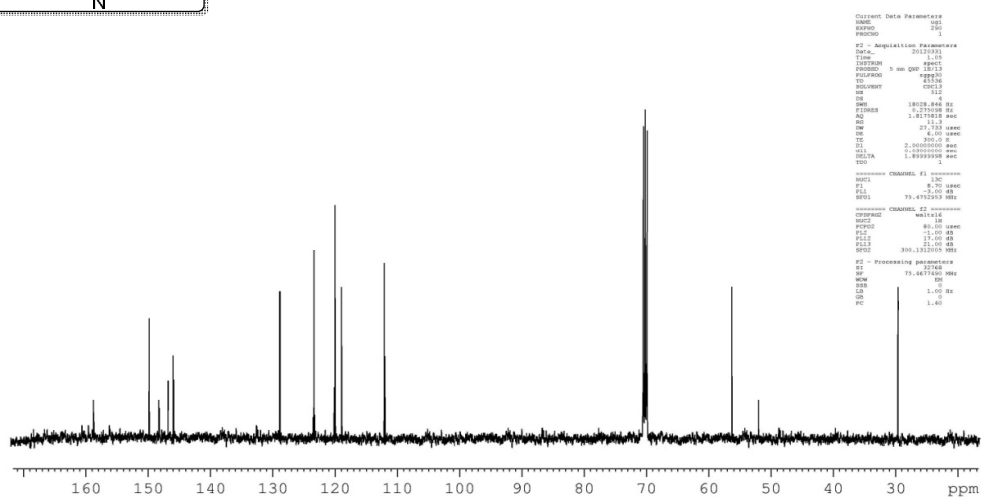

Fig. 13 (5m)



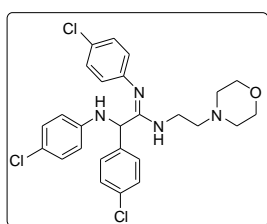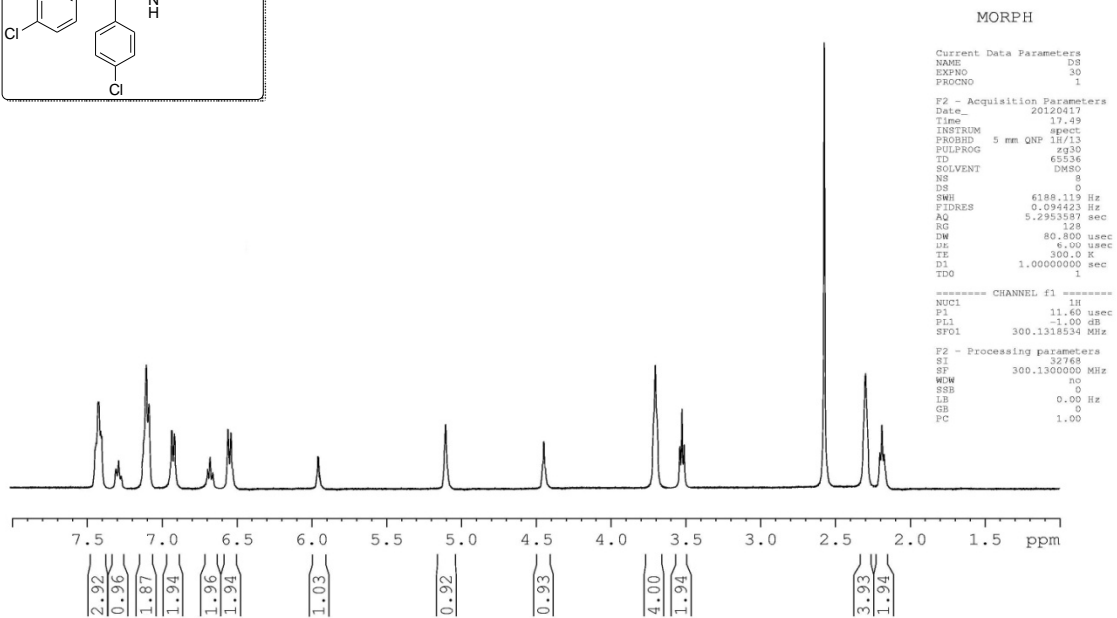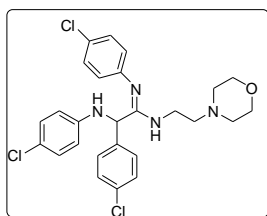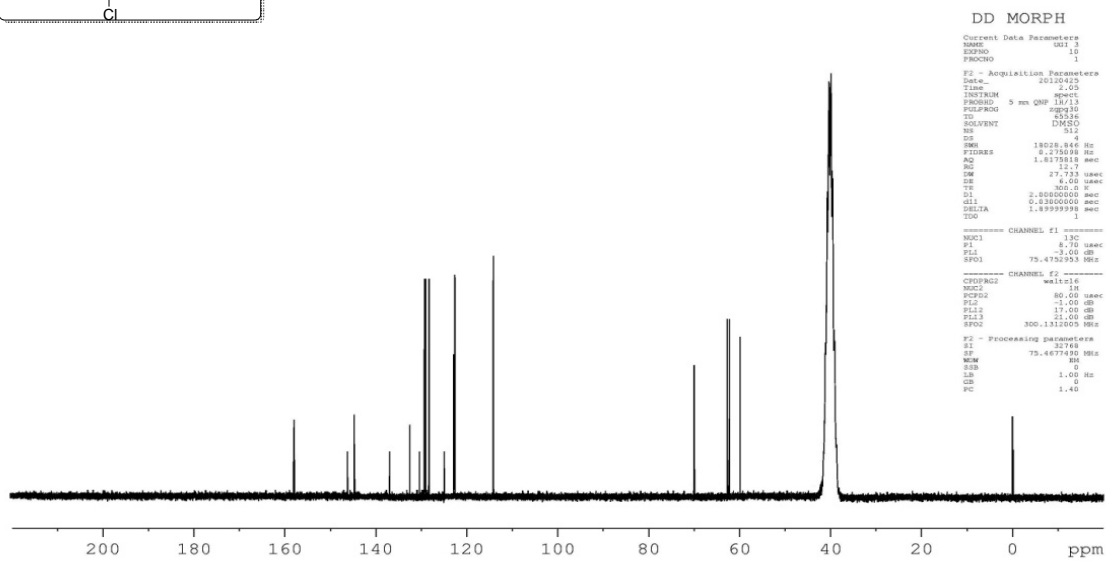

**Fig. 14 (5n)**

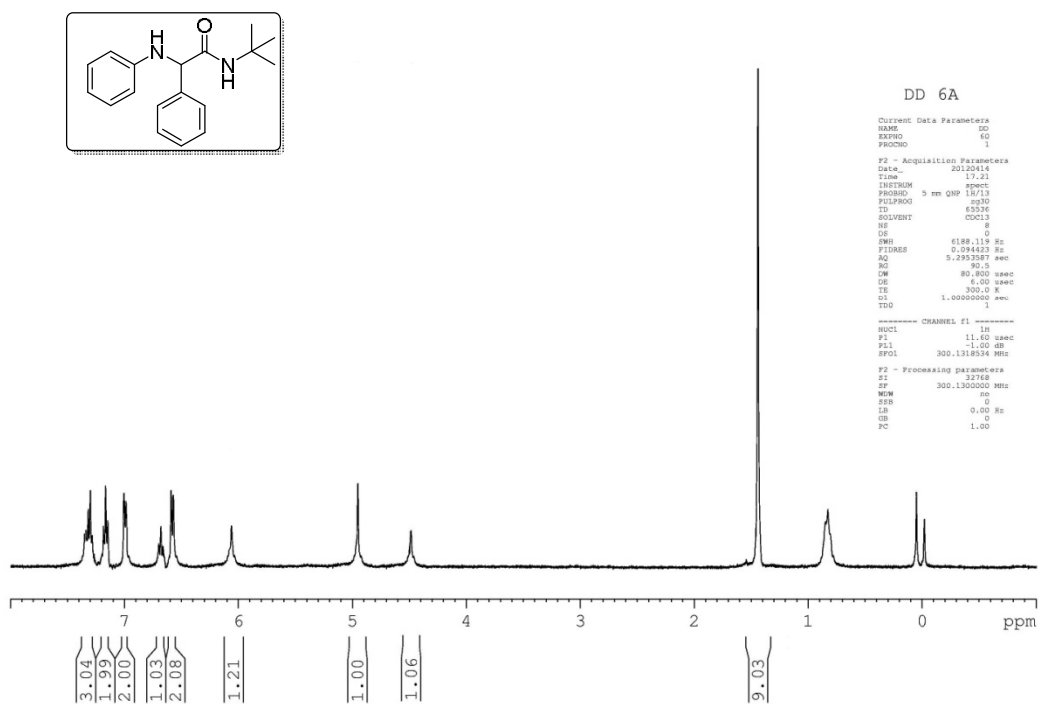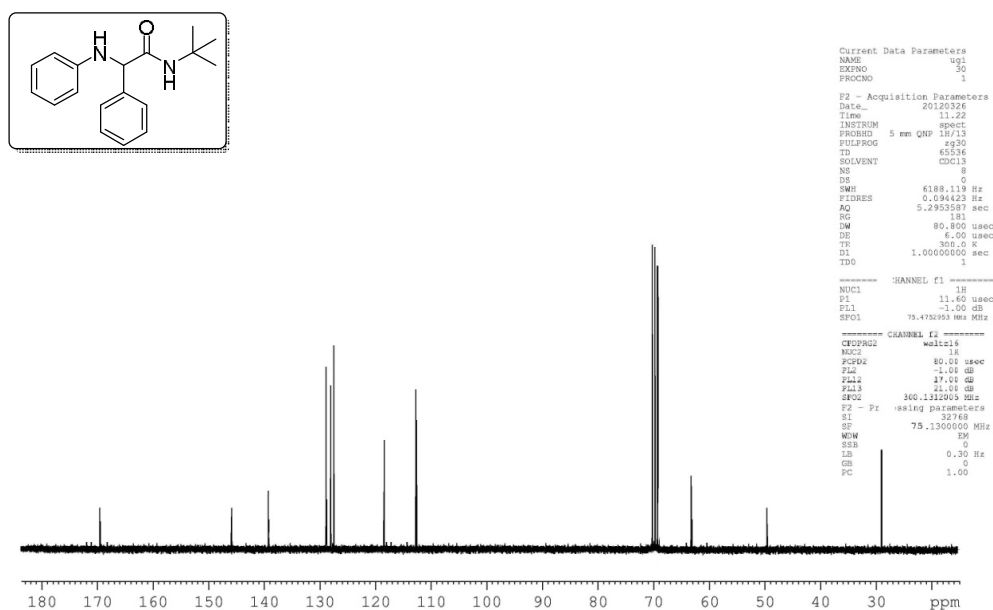

Fig 15 (6a)

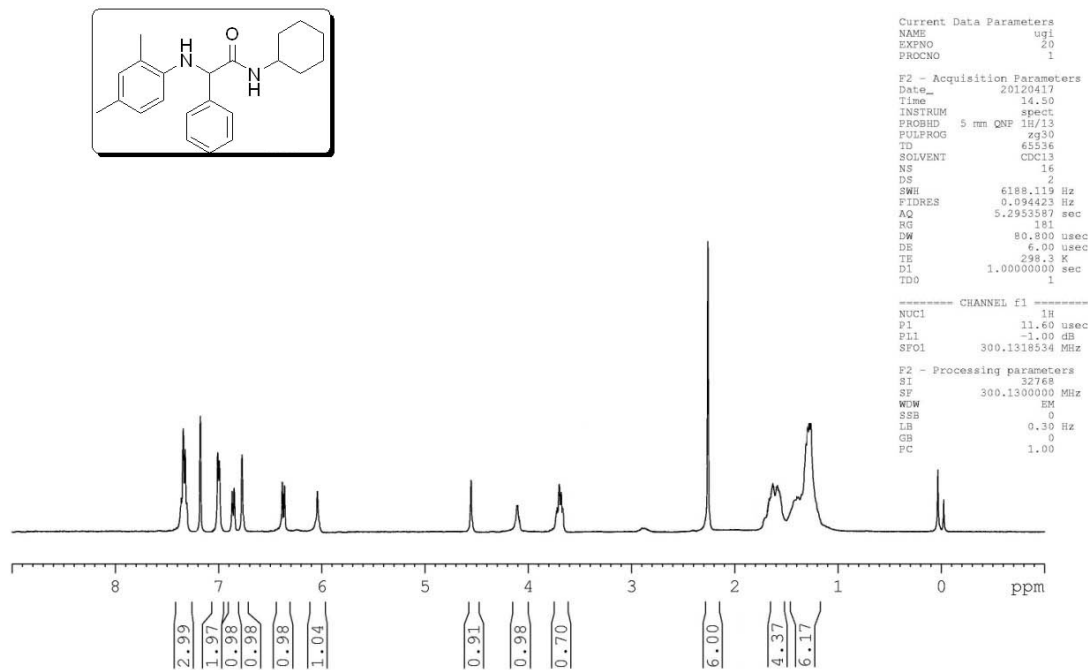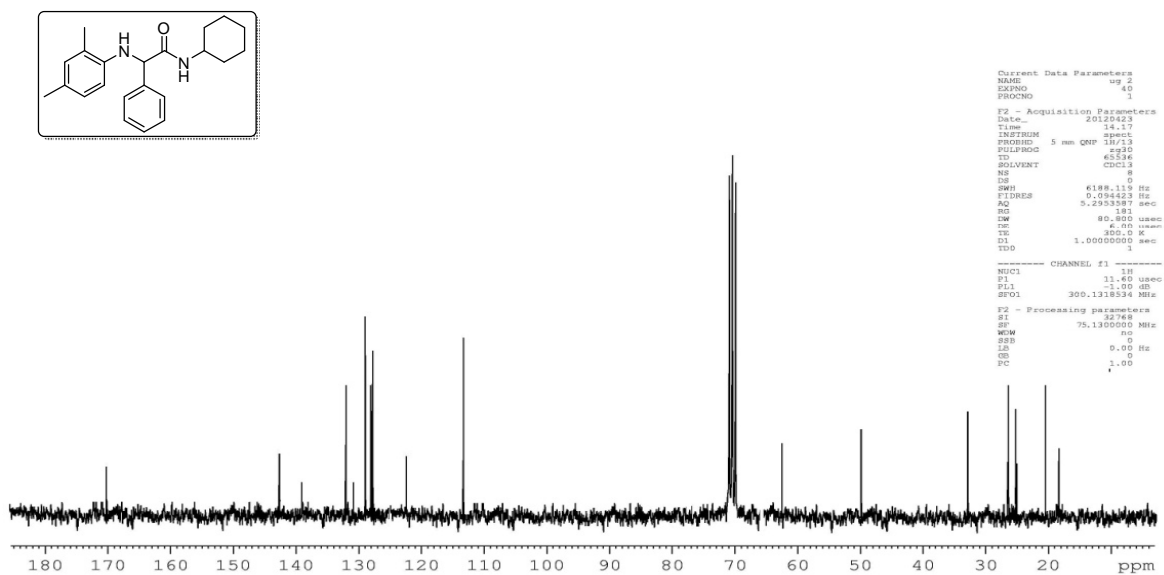

Fig. 16 (6k)

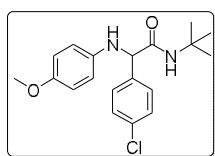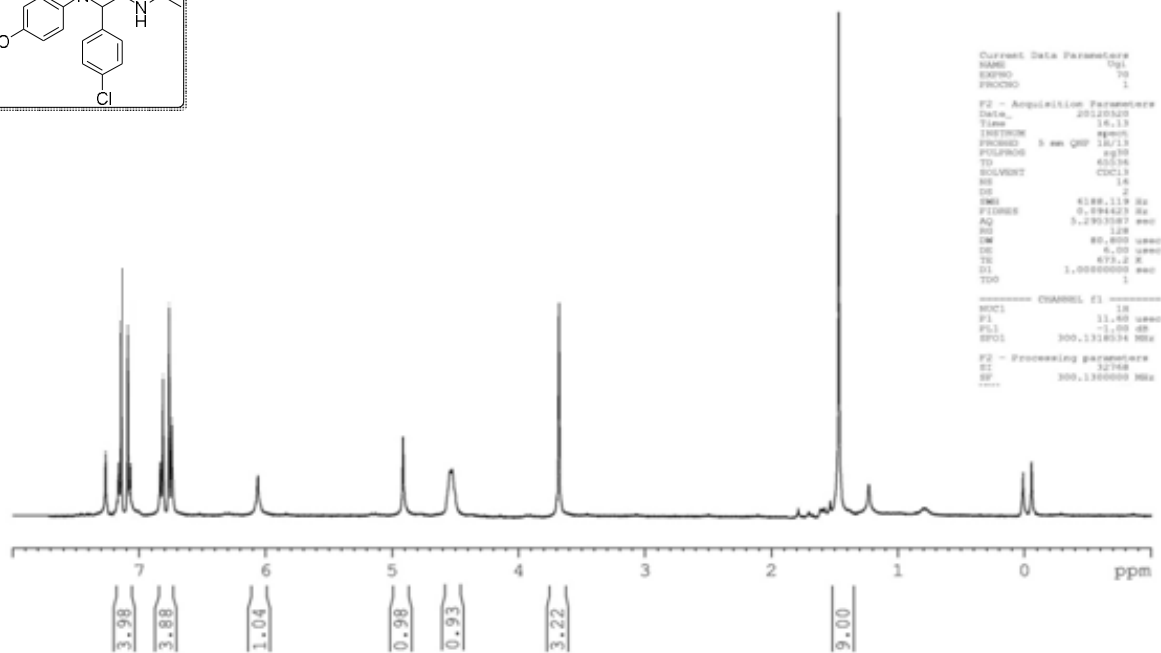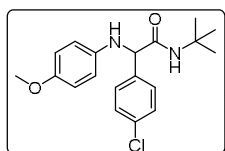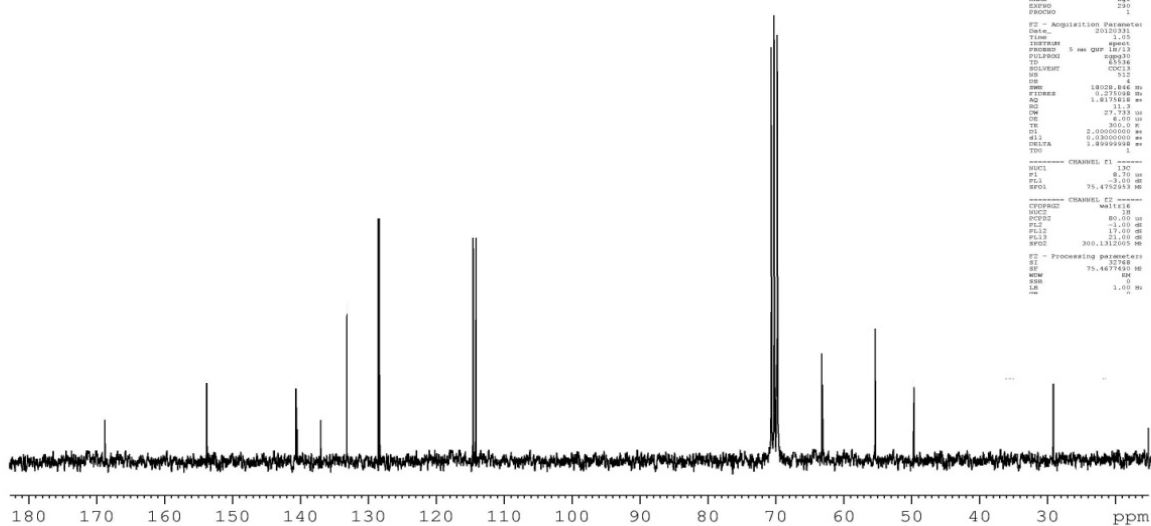

Fig. 17 (6i)

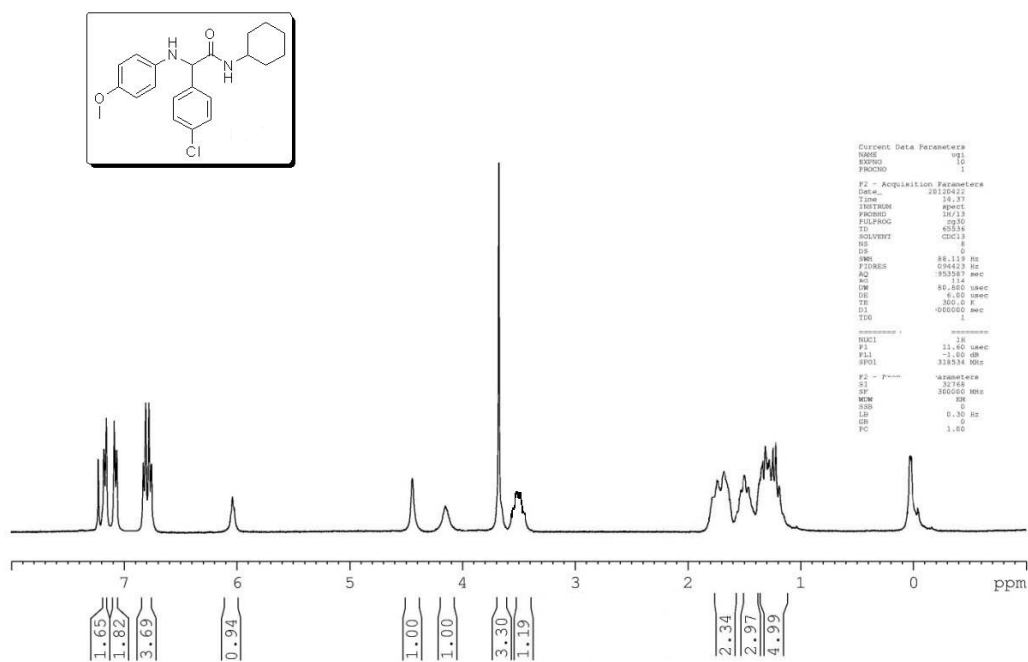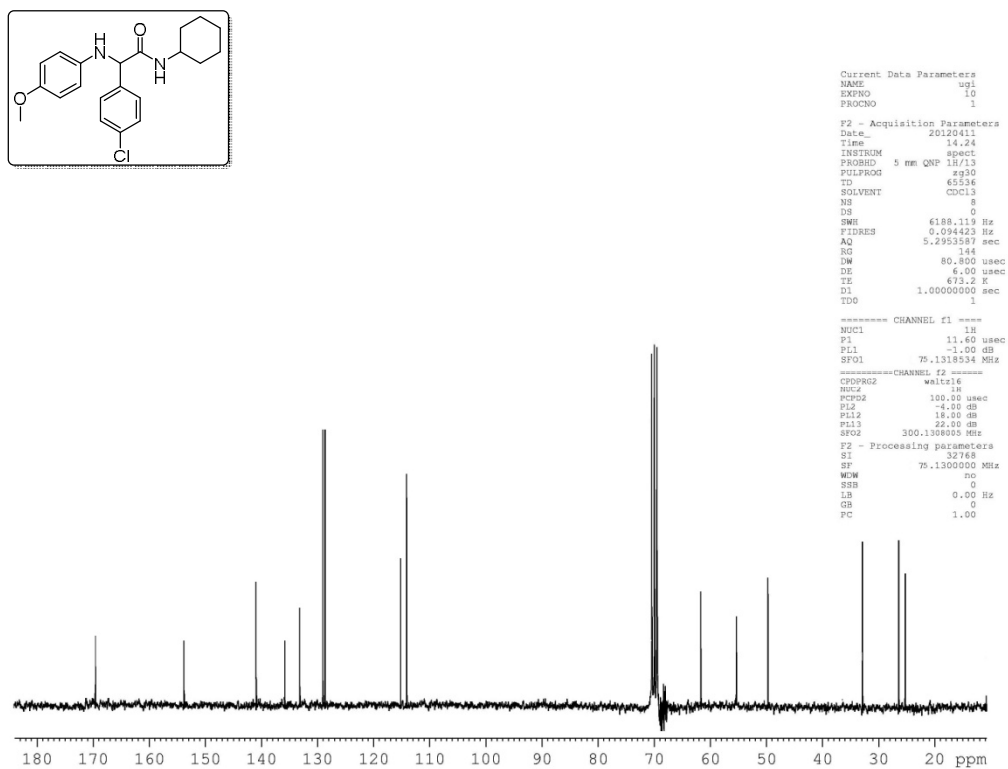

Fig. 18 (6b)

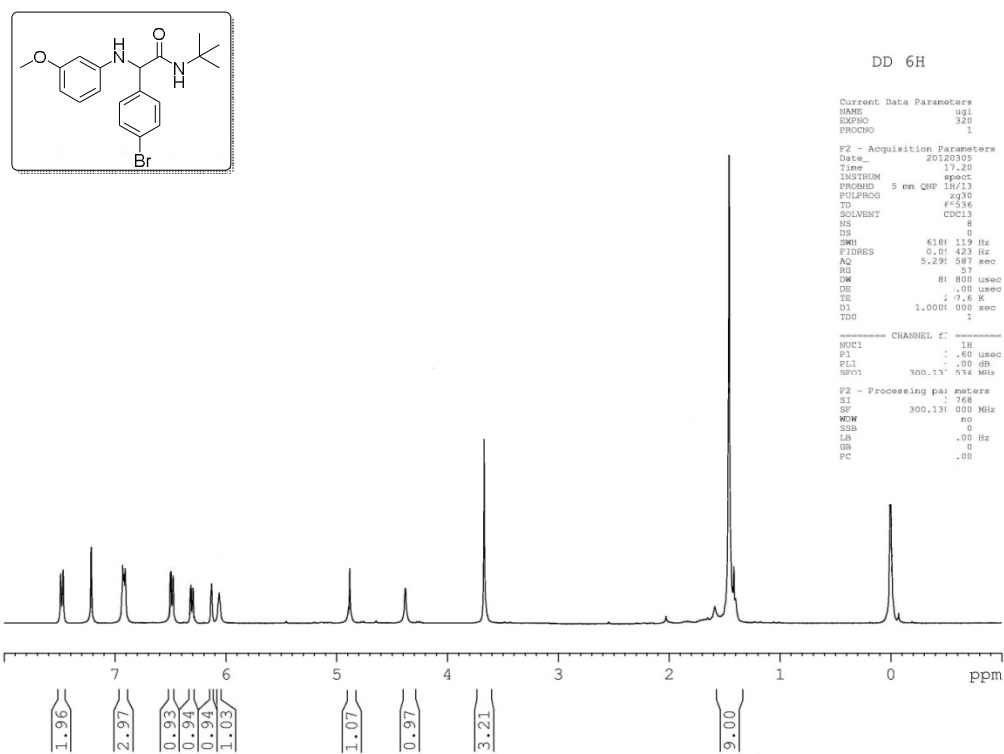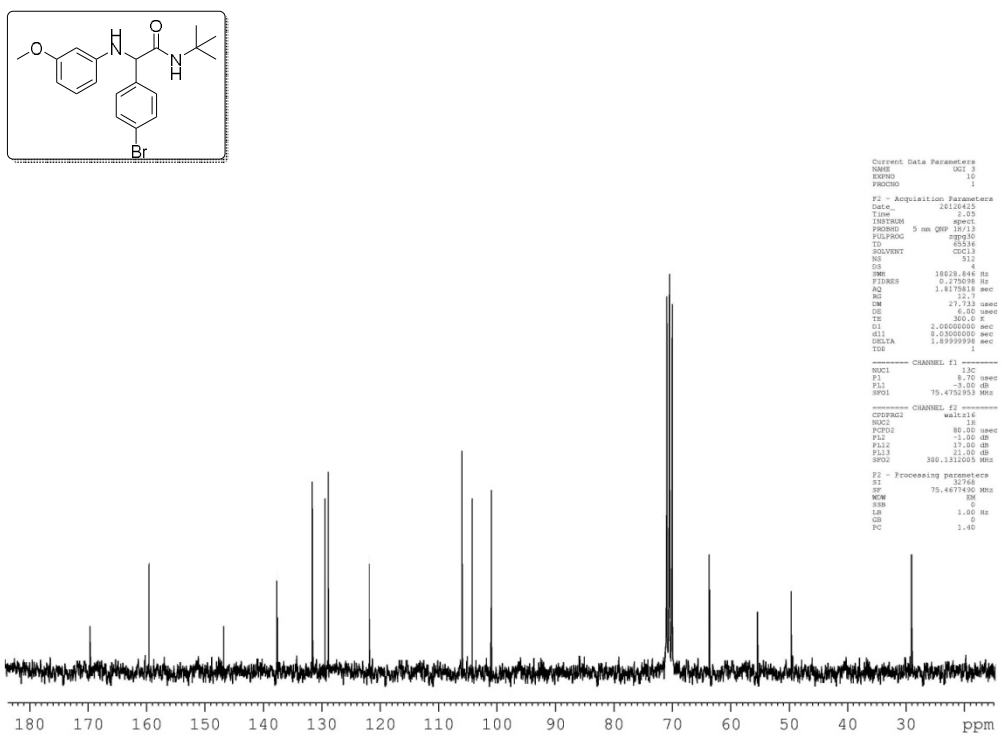

Fig. 19 (6h)

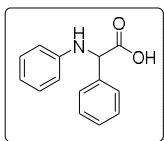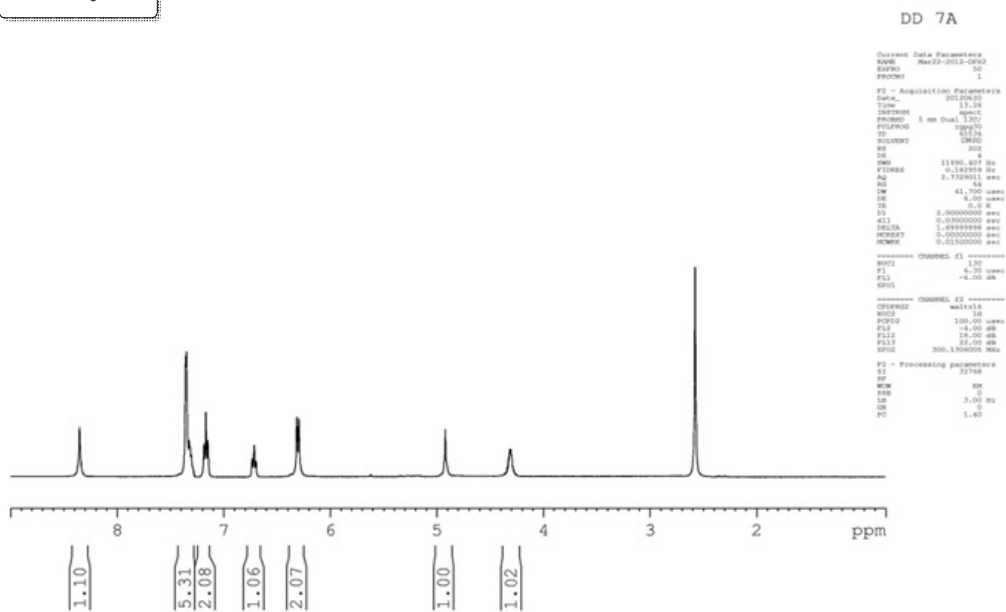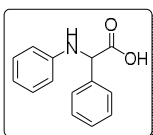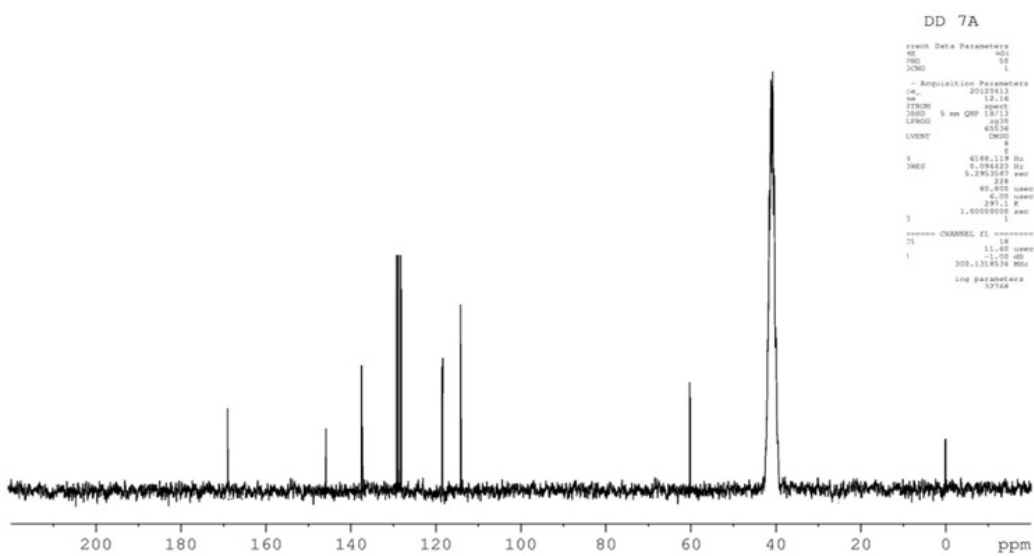

Fig. 20 (7a)



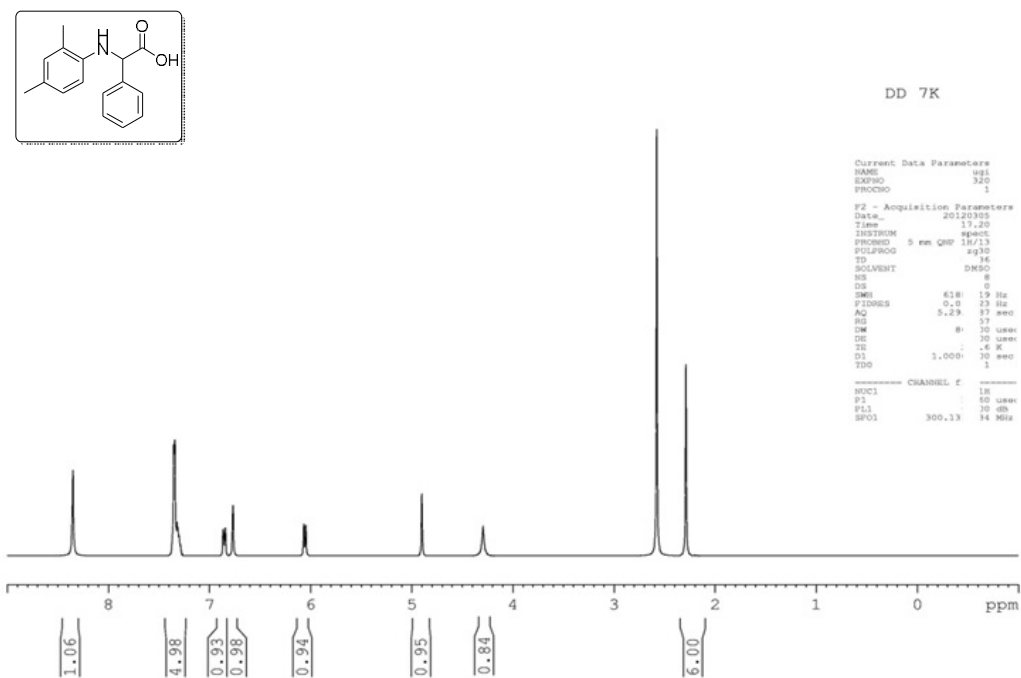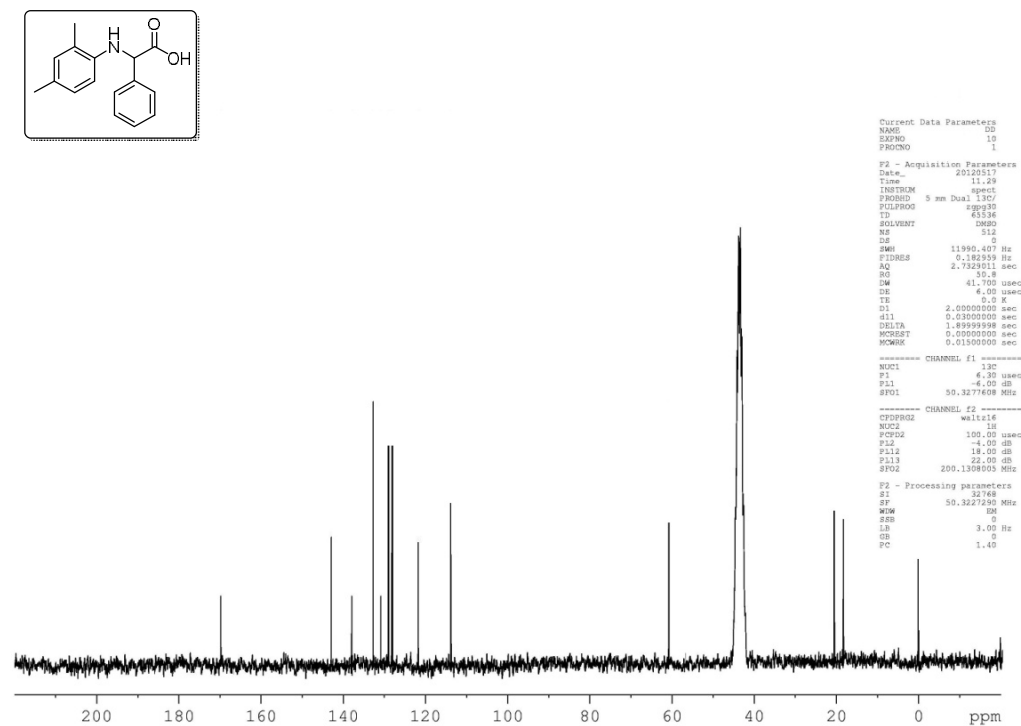

Fig. 21 (7k)
